# Supplementary material for: Copper-catalyzed direct coupling of benzoxazin-2-ones with indoles for the synthesis of diverse 3-indolylbenzoxazin-2-ones: access to natural cephalandole A
Source: Royal Society of Chemistry journal article supplement (doi:10.1039/c7ra10634c), 2017-01-01

## **Copper-catalyzed direct coupling of benzoxazin-2-ones with indoles for the synthesis of diverse 3-indolylbenzoxazin-2-ones: An access to natural cephalandole A**

Rameshwar Prasad Pandit,<sup>a</sup> Jae-Jin Shim,<sup>a</sup> Sung Hong Kim,<sup>b</sup> and Yong Rok Lee<sup>\*a</sup>

<sup>a</sup> School of Chemical Engineering, Yeungnam University, Gyeongsan 712-749, Republic of Korea  
[yrlee@yu.ac.kr](mailto:yrlee@yu.ac.kr)

Phone: 82-53-810-2529. Fax: 82-53-810-4631

<sup>b</sup> Analysis Research Division, Daegu Center, Korea Basic Science Institute, Daegu 41566, Republic of Korea

### **Electronic Supplementary Information (ESI)**

#### **Contents**

|                                |   |
|--------------------------------|---|
| Scope of substrates            | 2 |
| Copies of spectra of compounds | 3 |

## Scope of substrates used in the reaction

---

### Imino cyclic esters

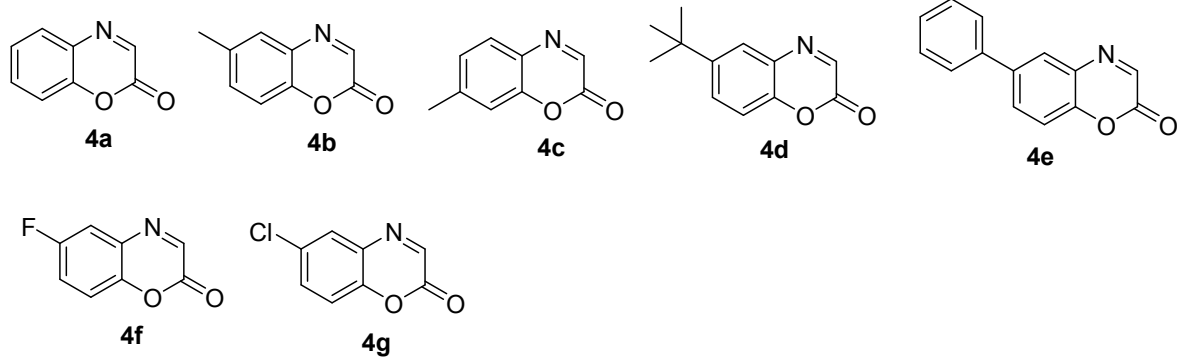

---

### Indoles

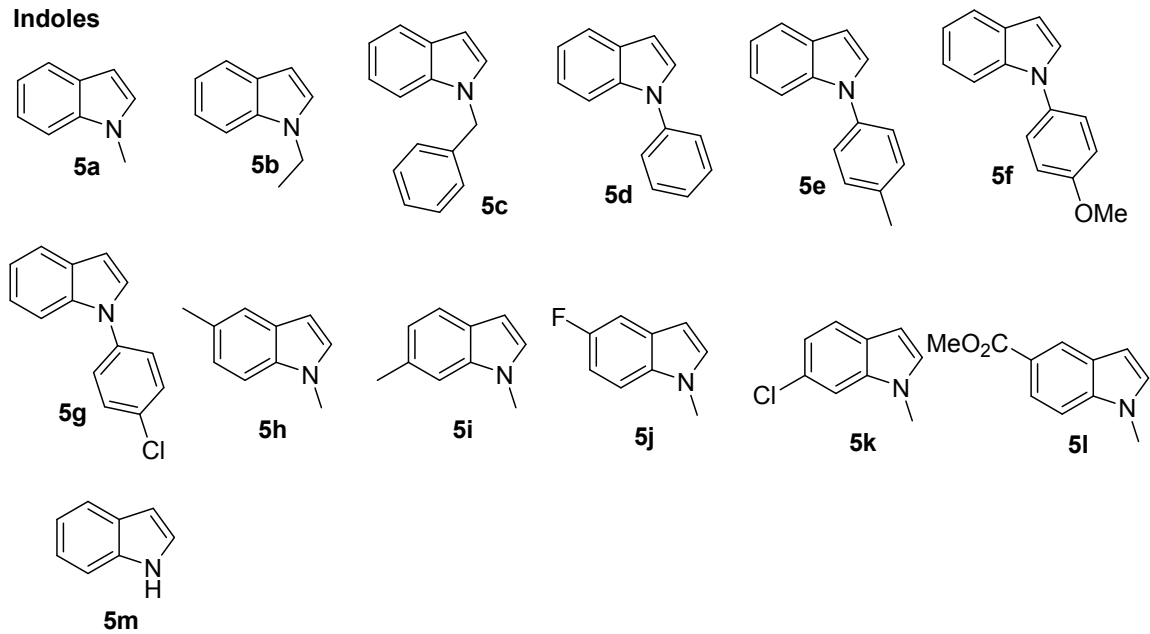

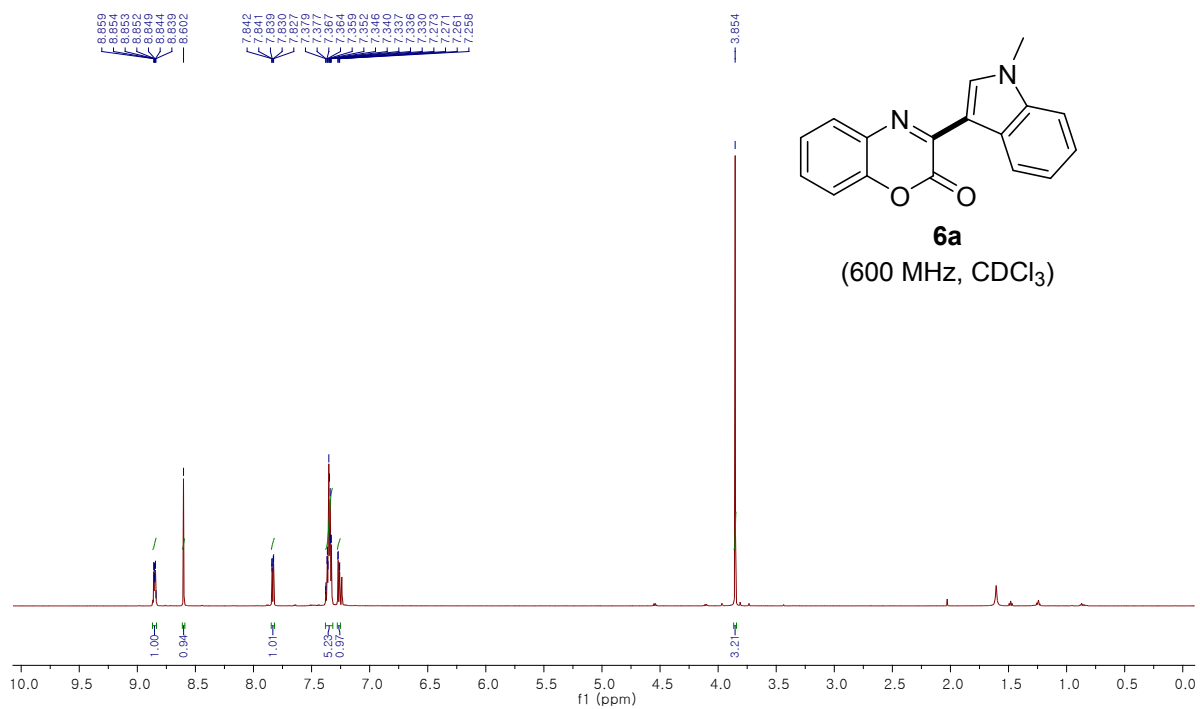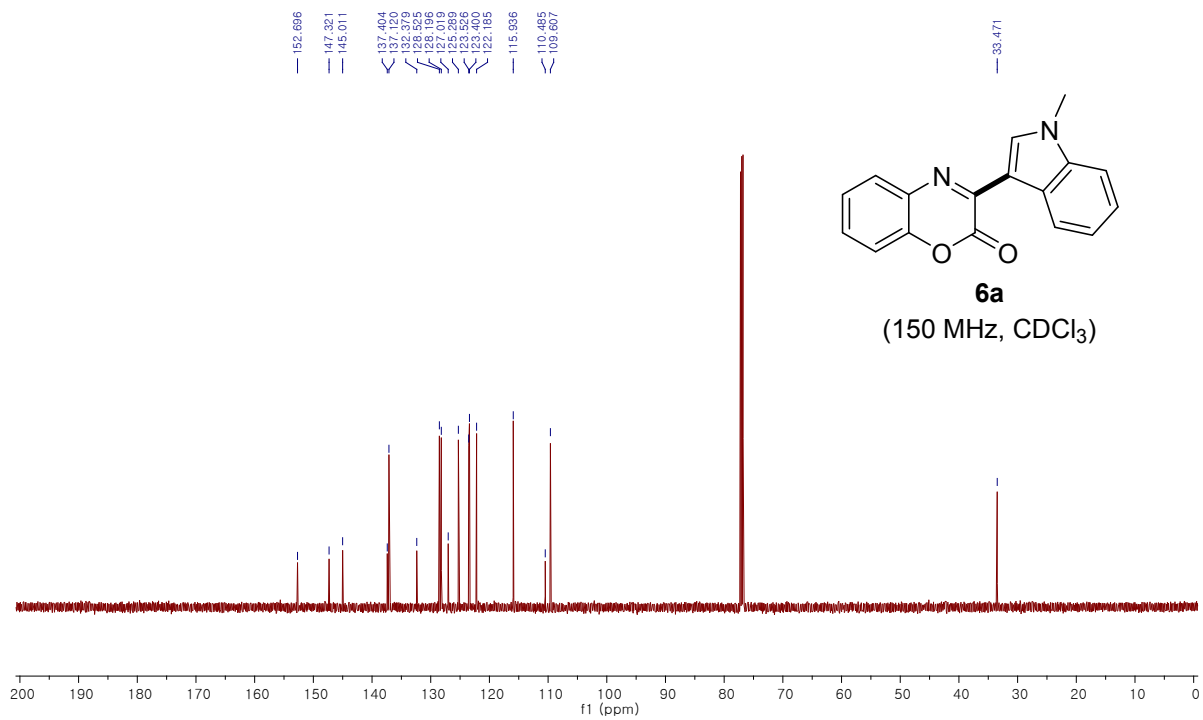

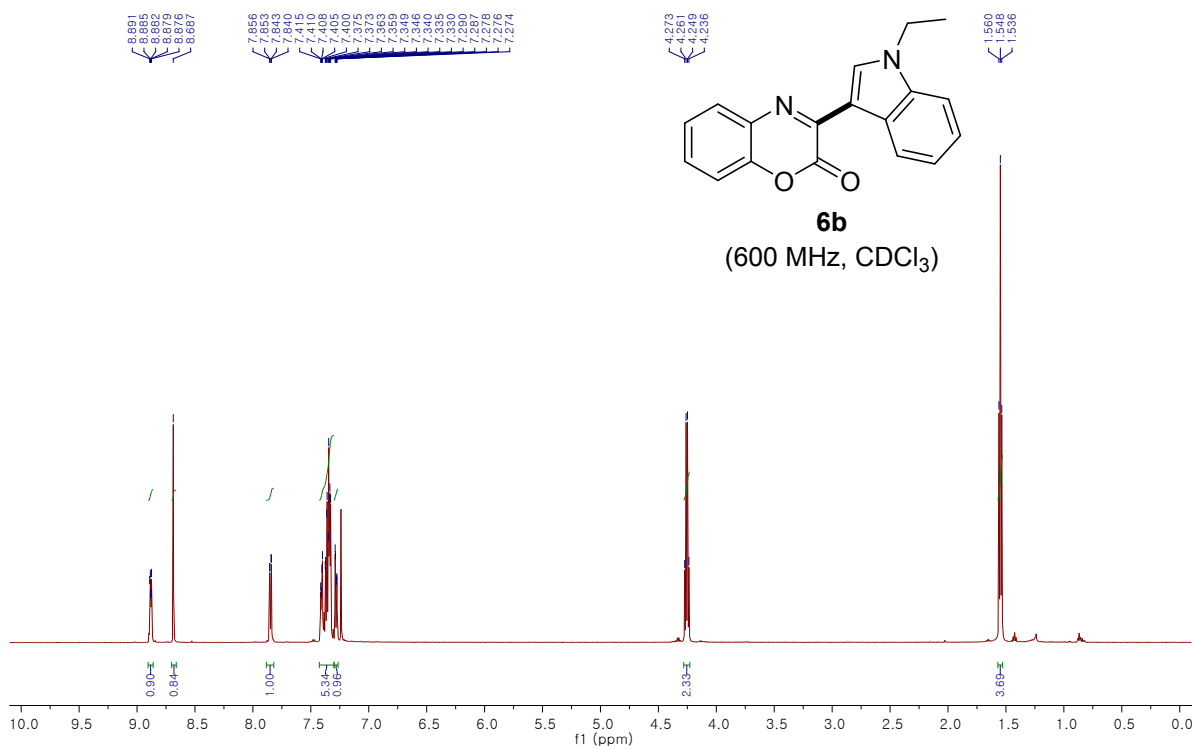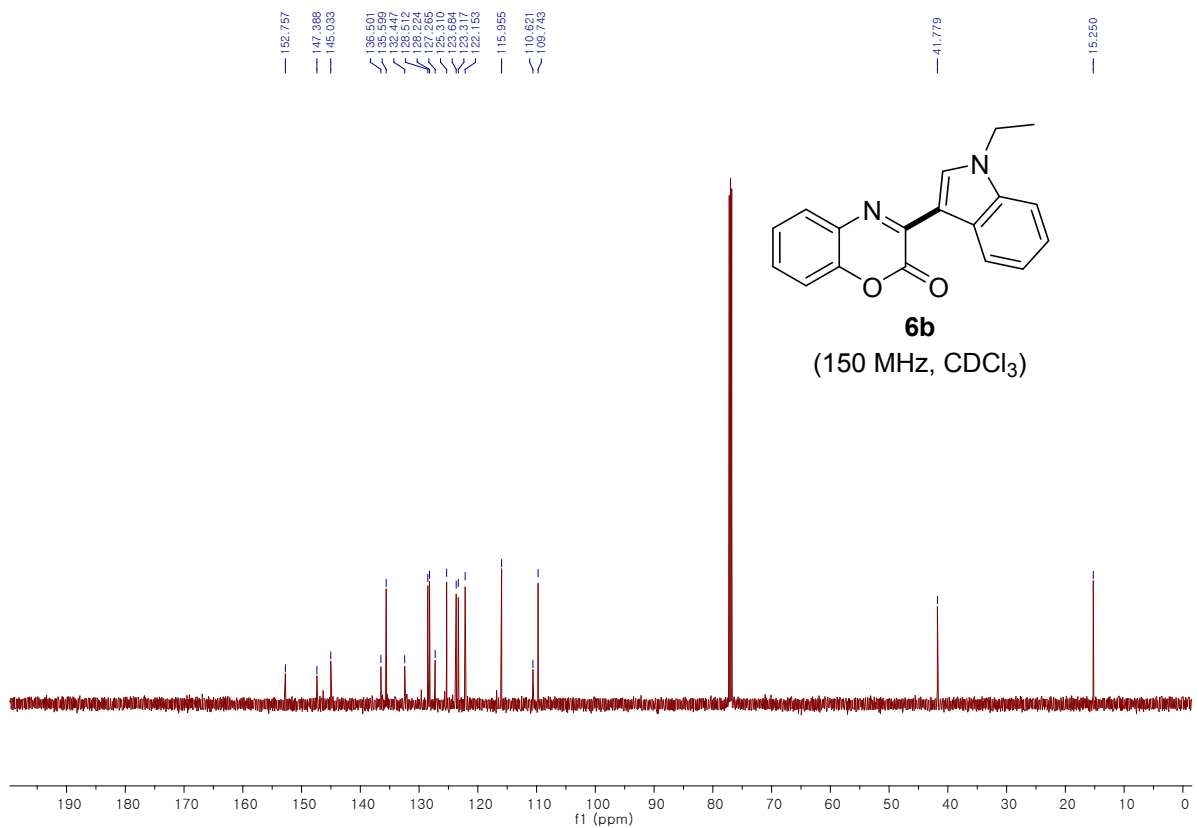

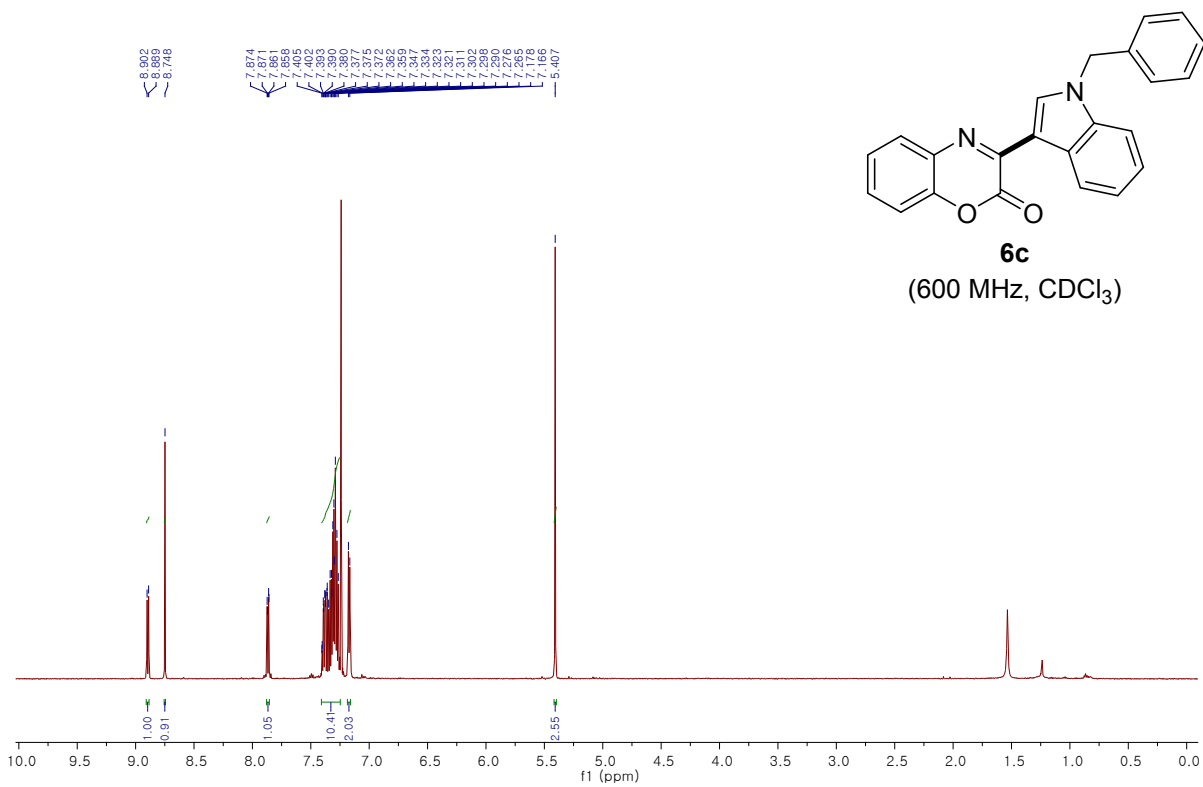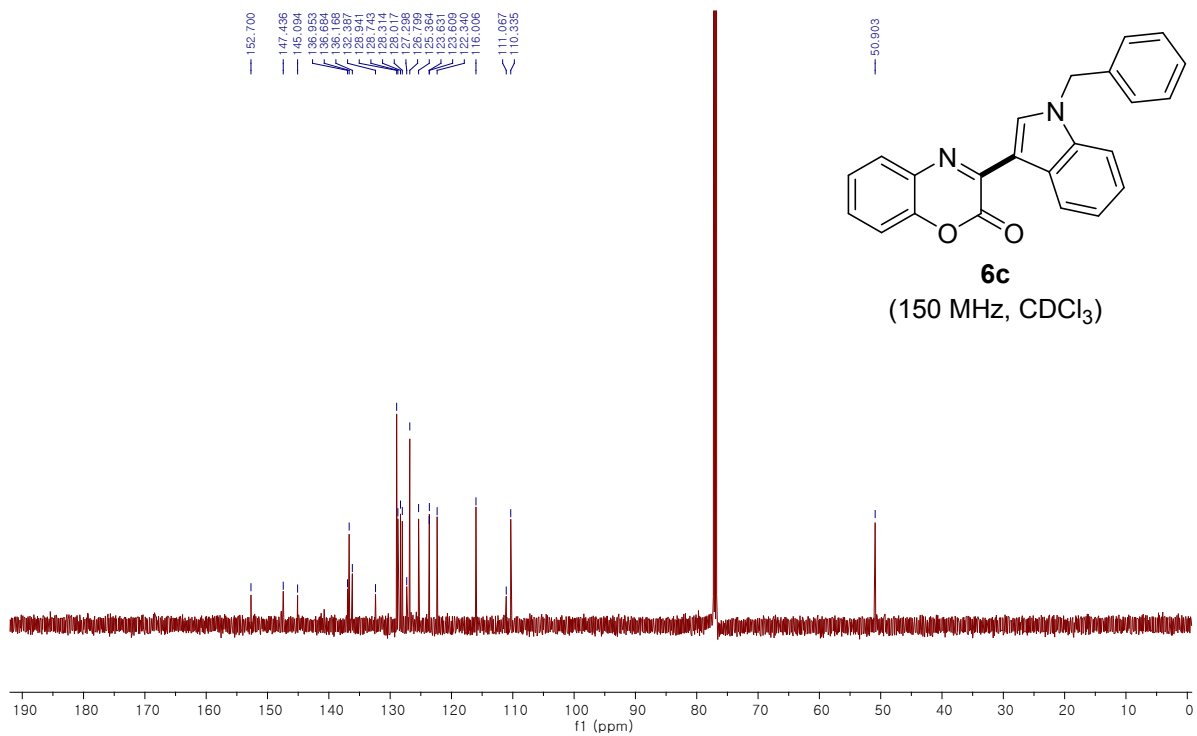

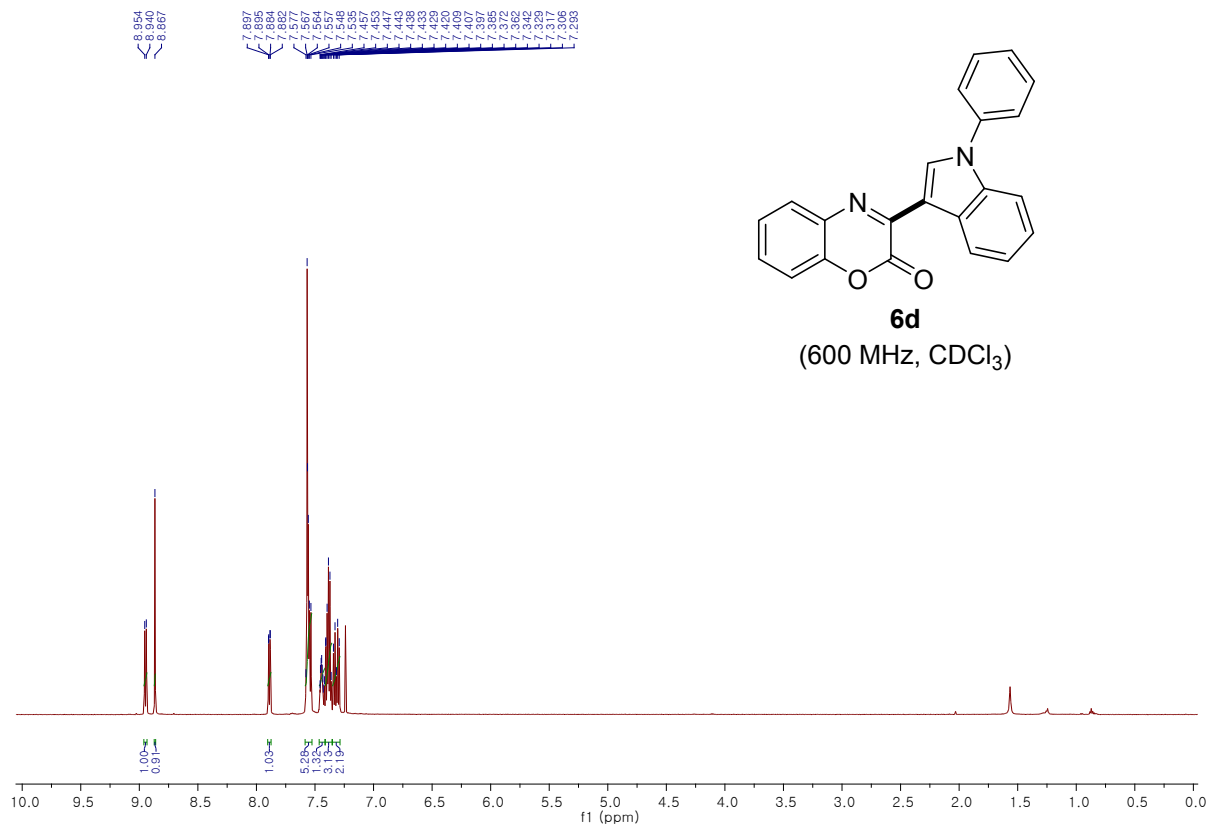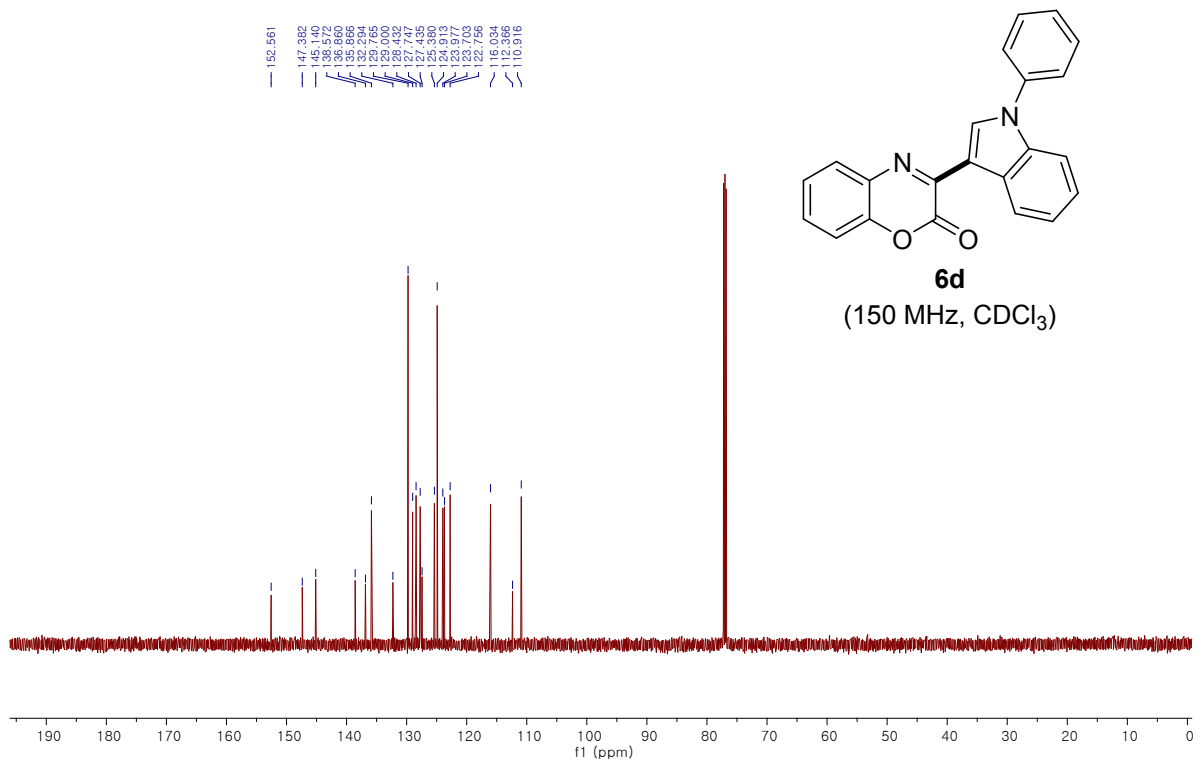

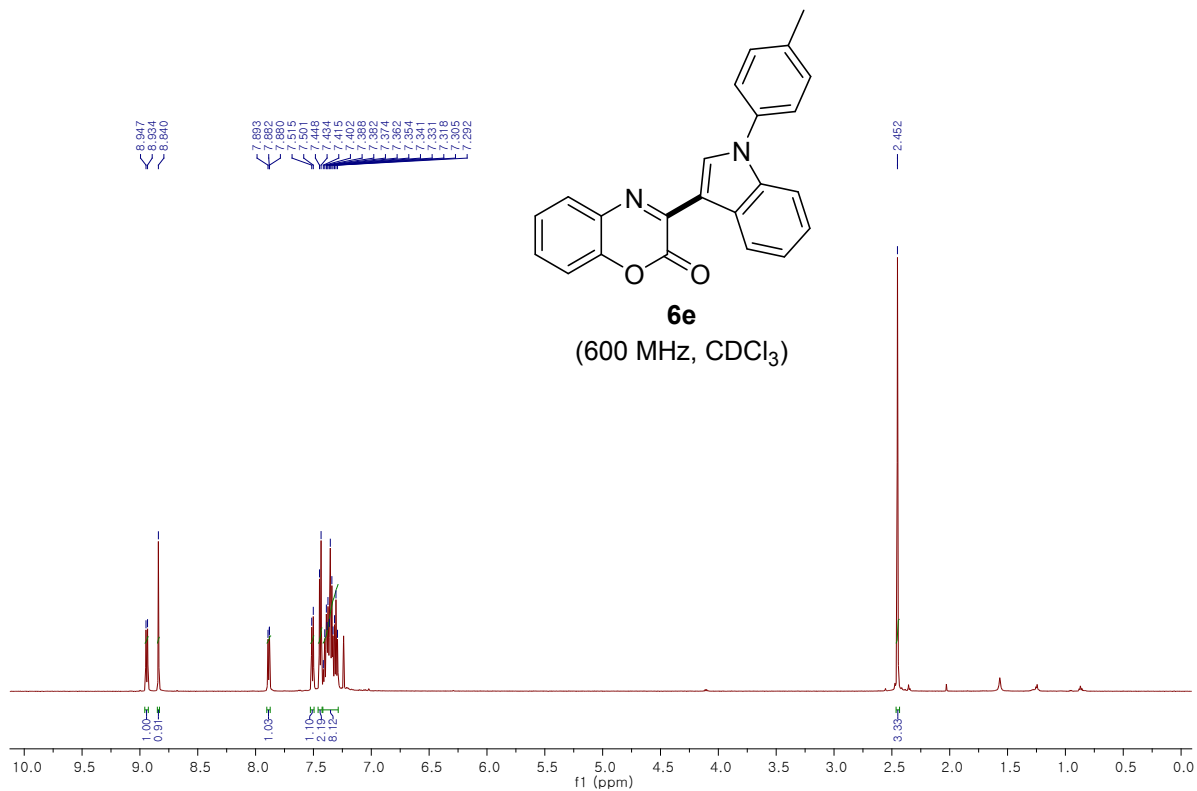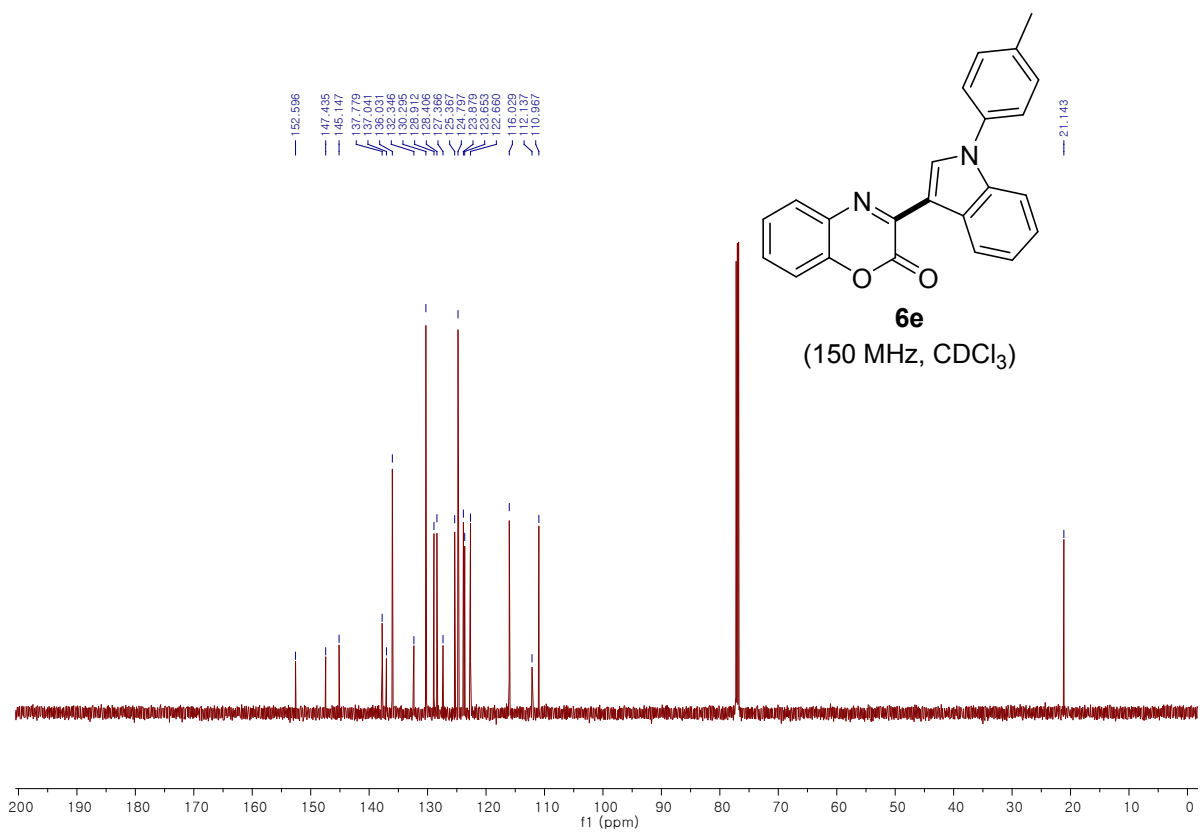

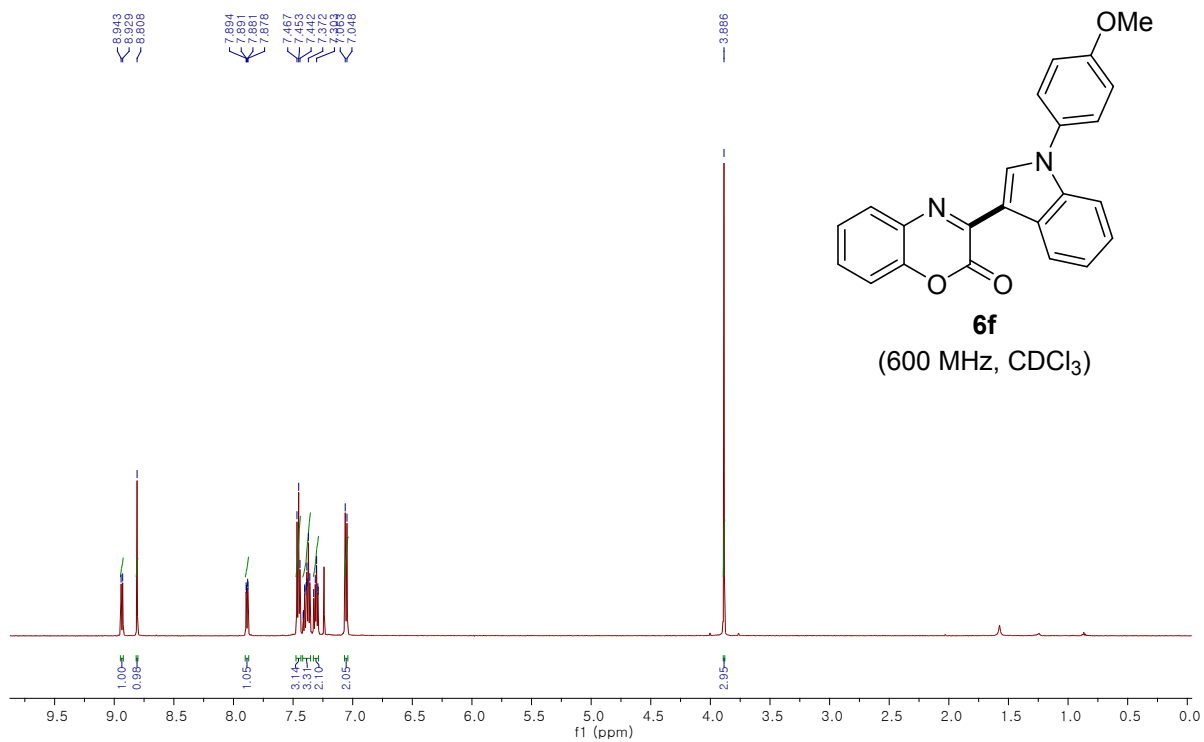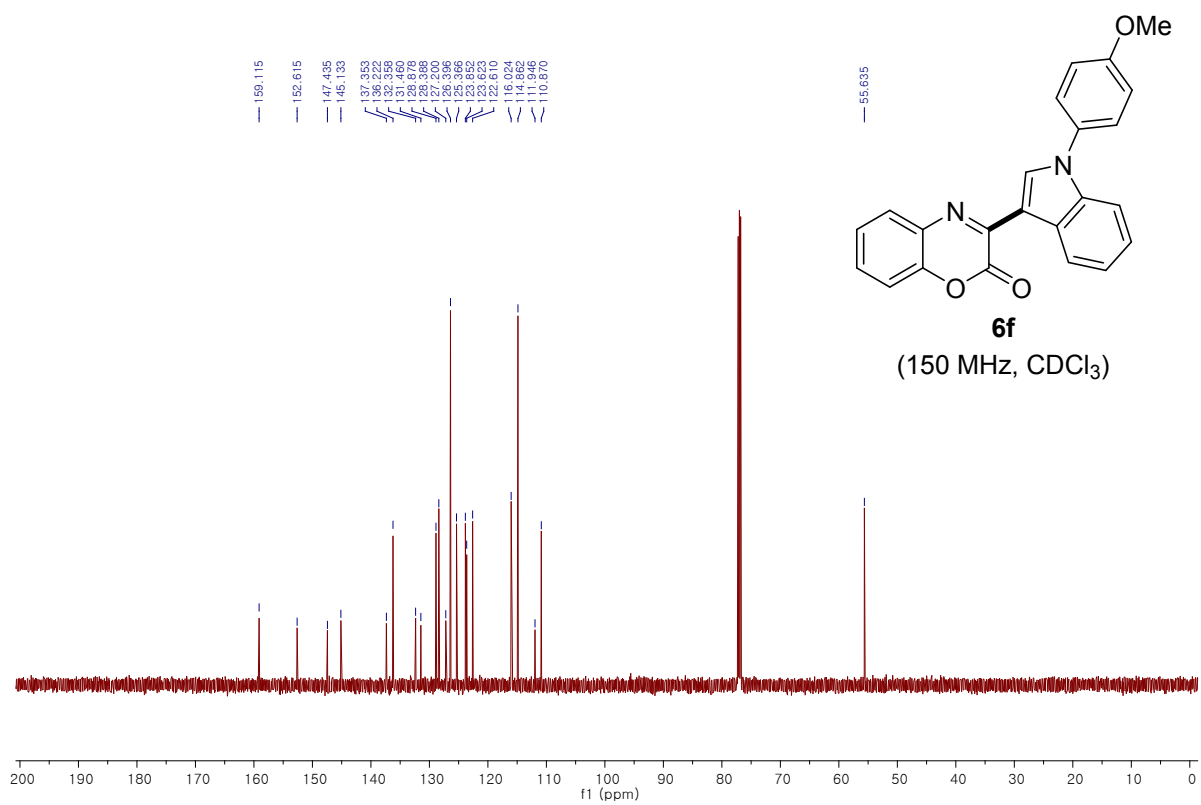



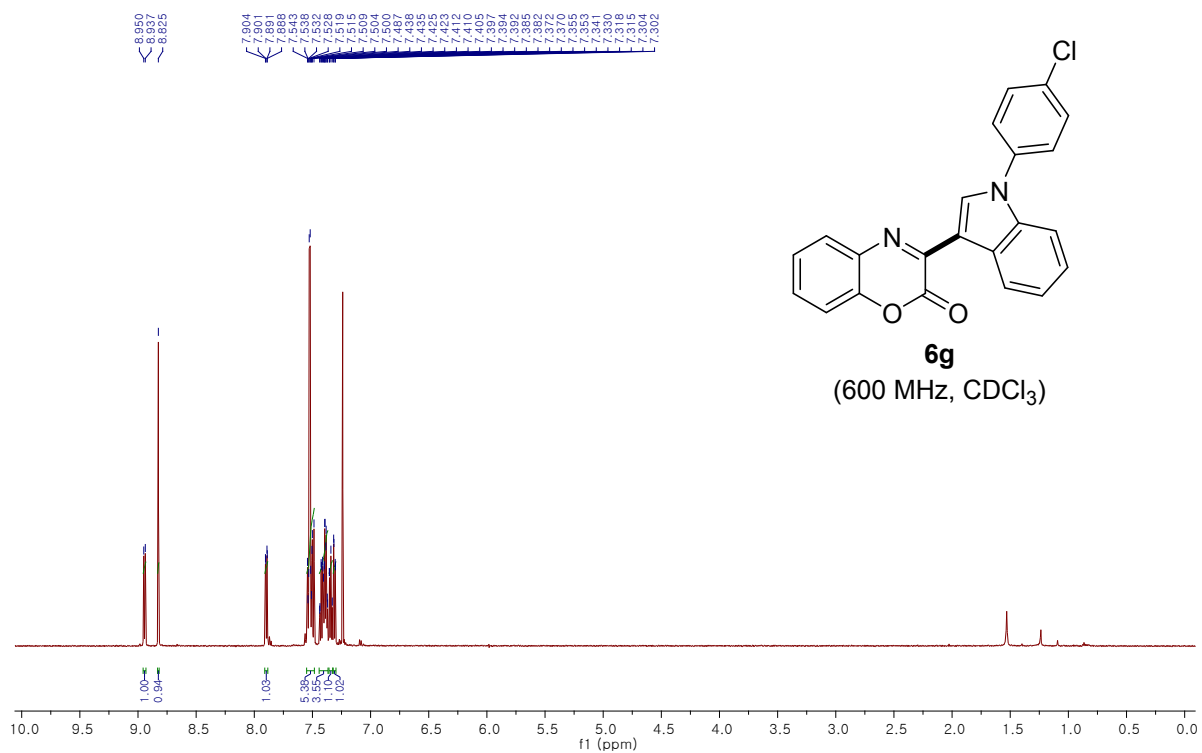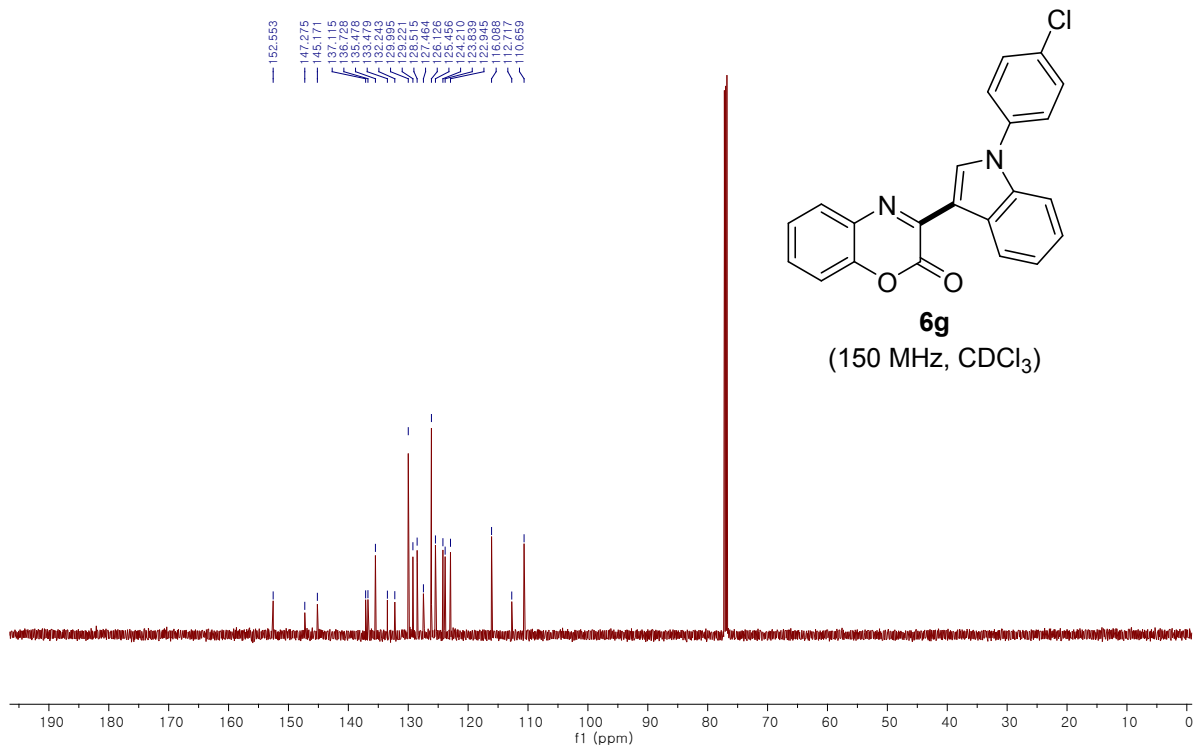

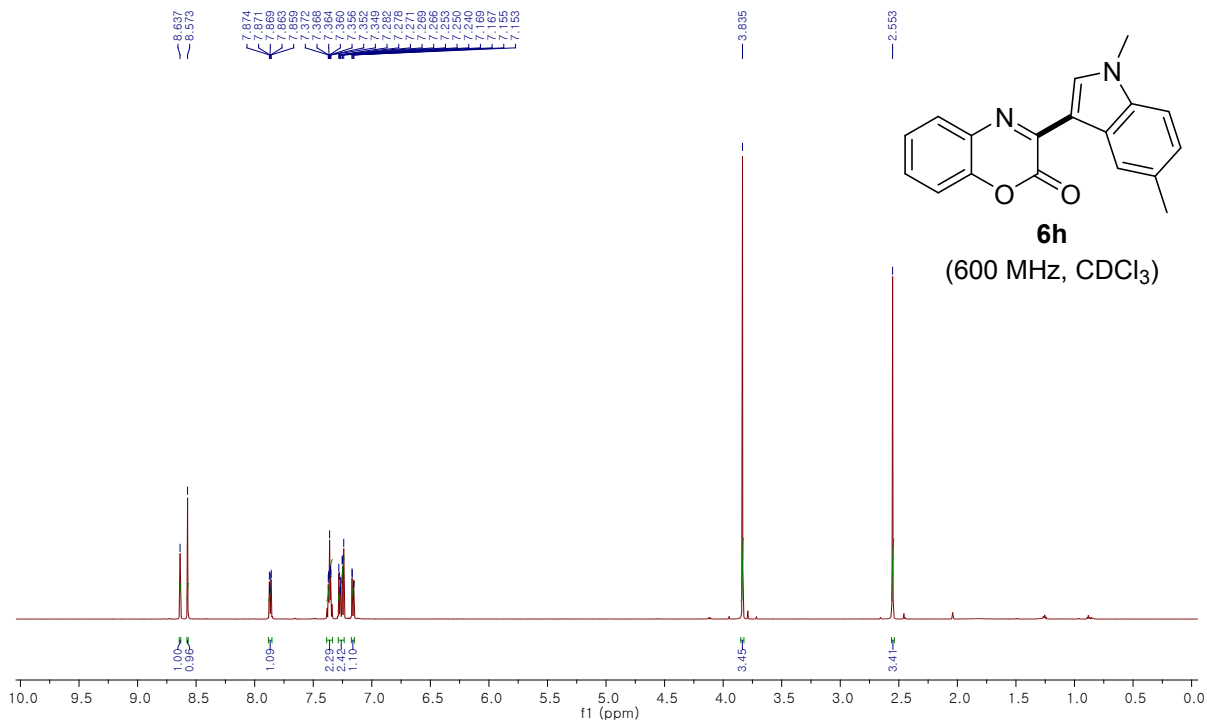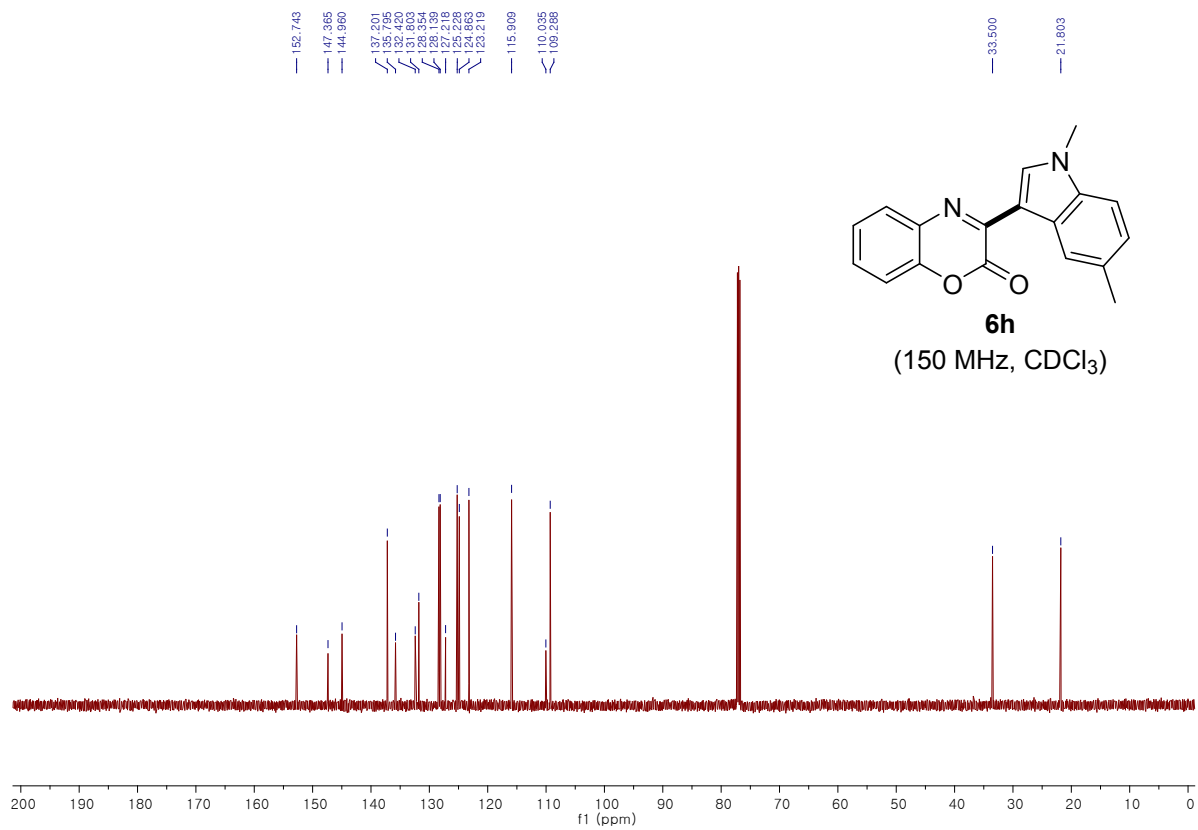





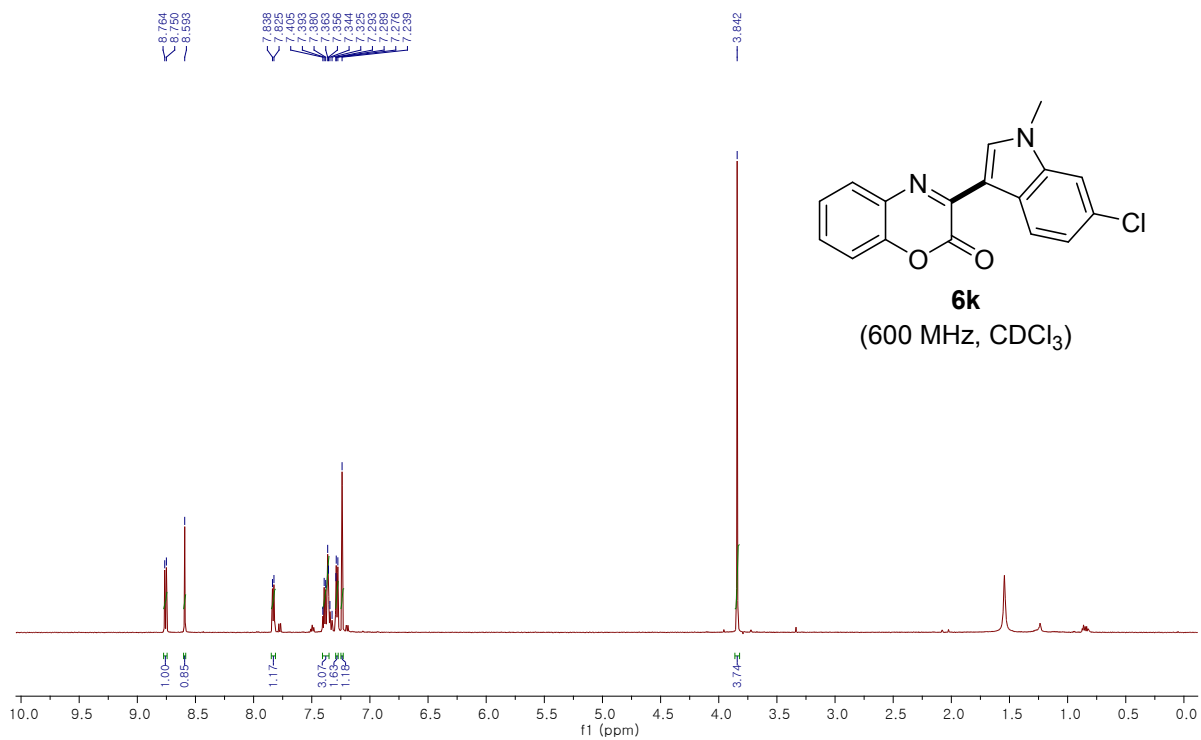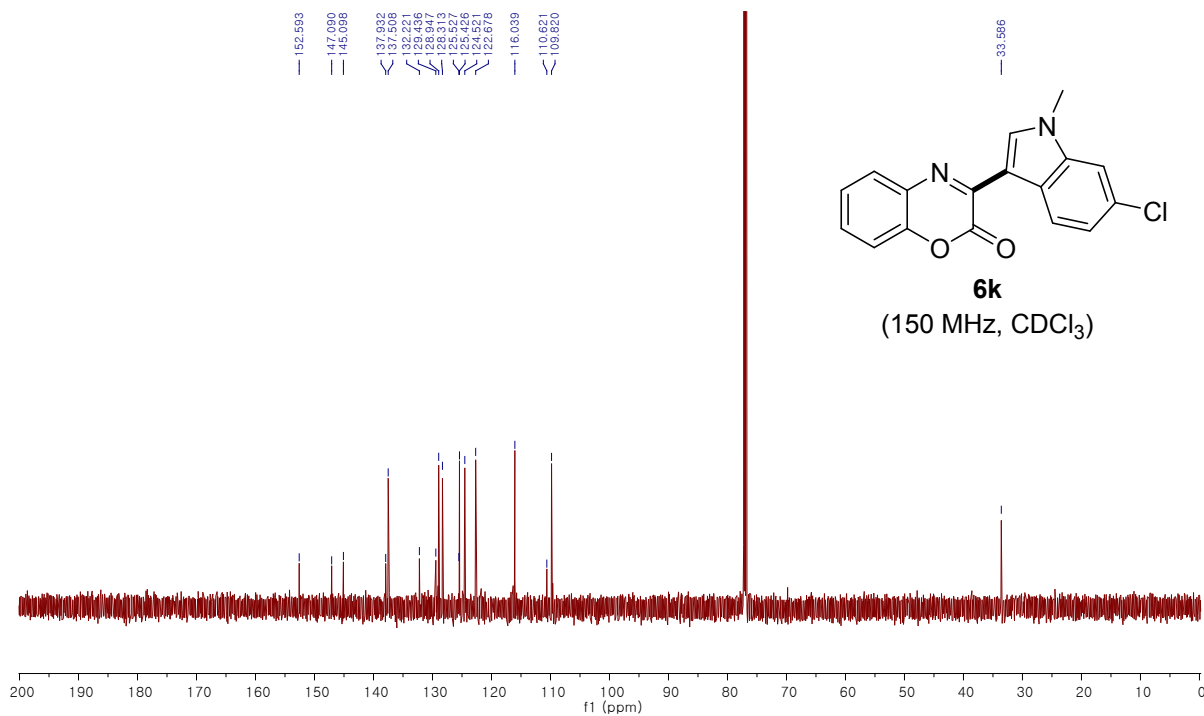

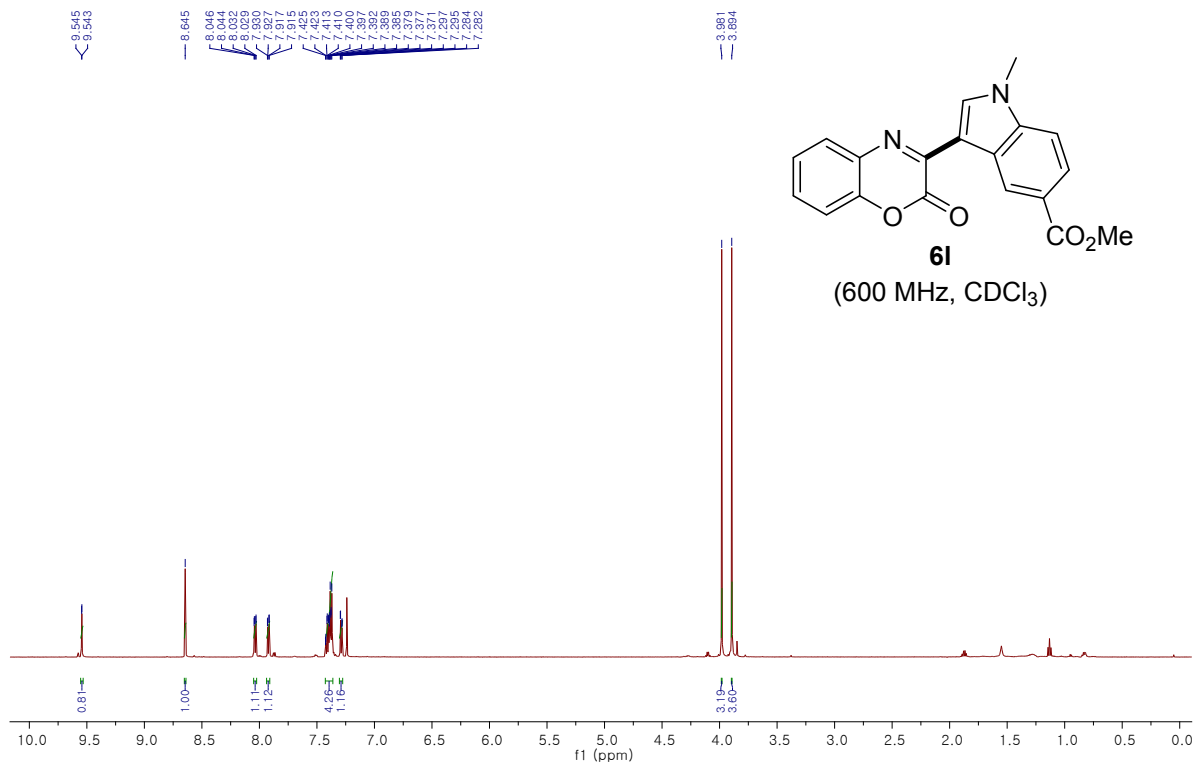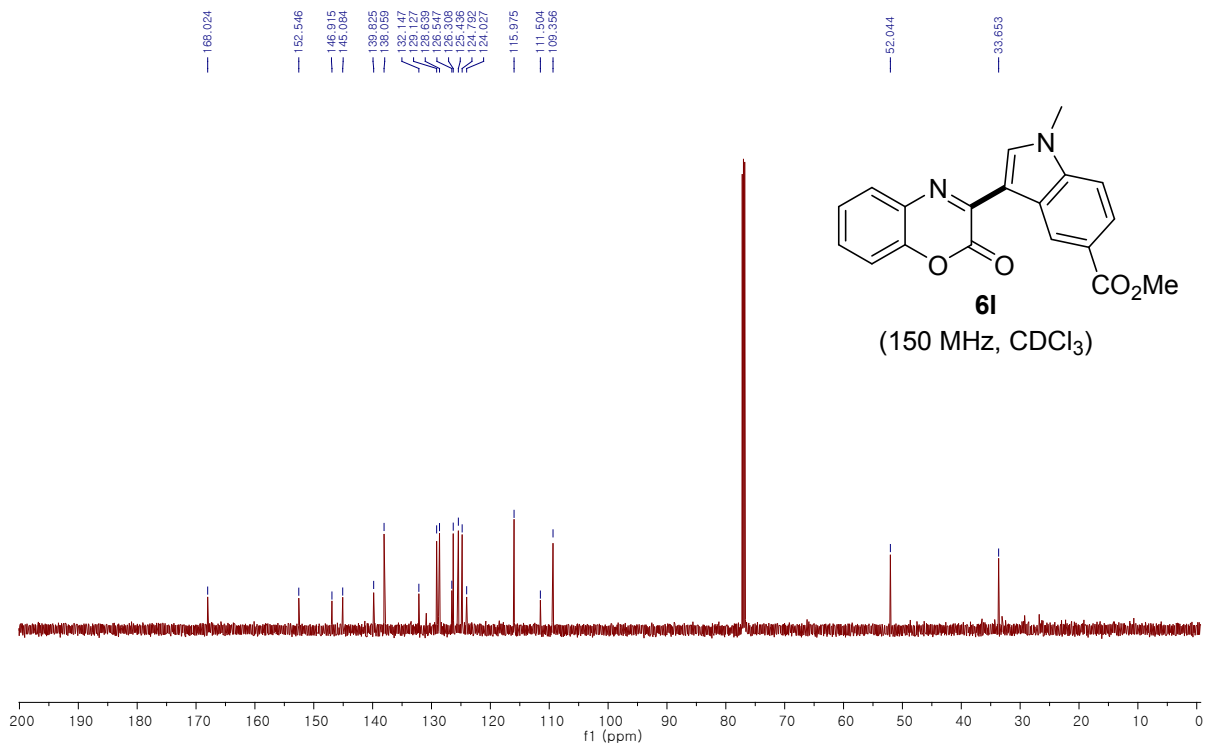



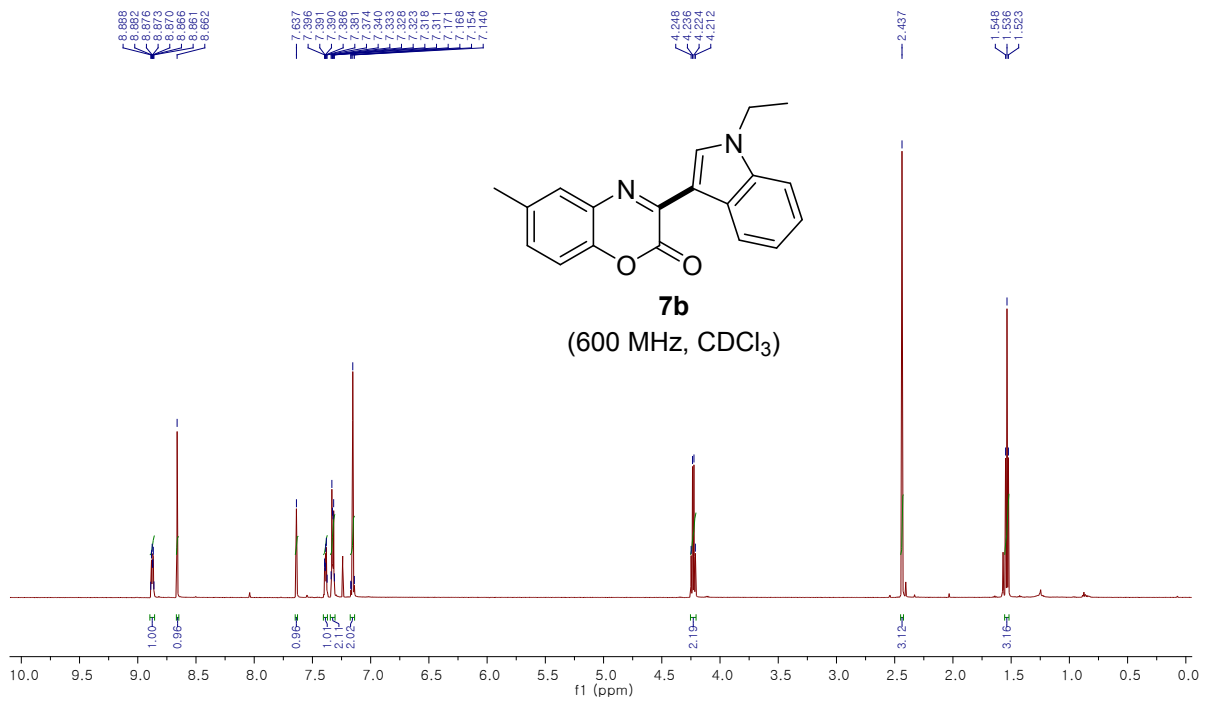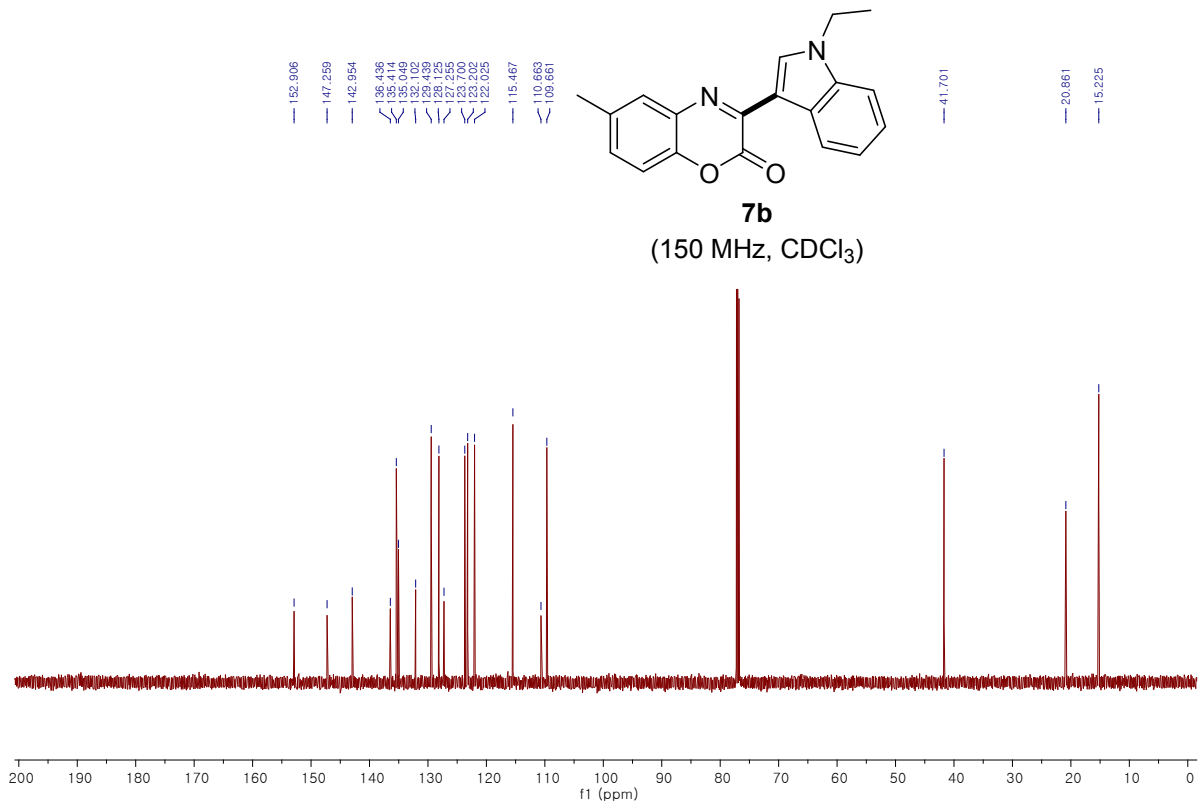



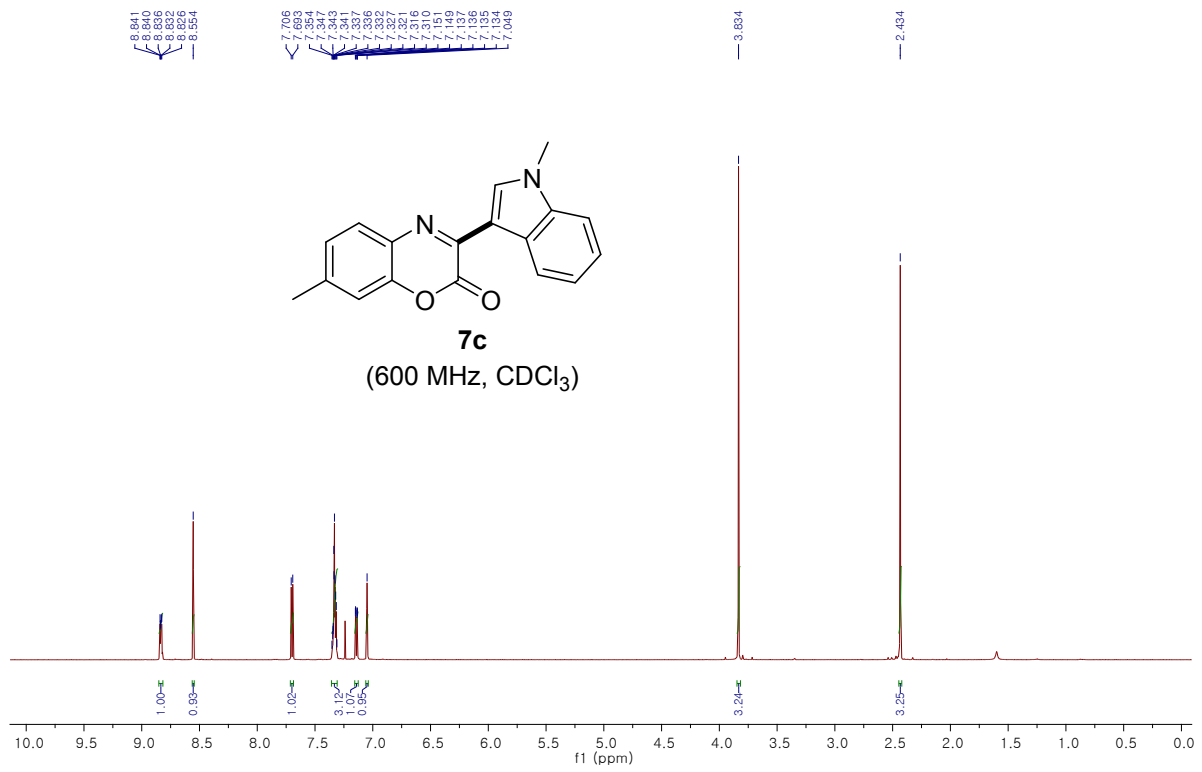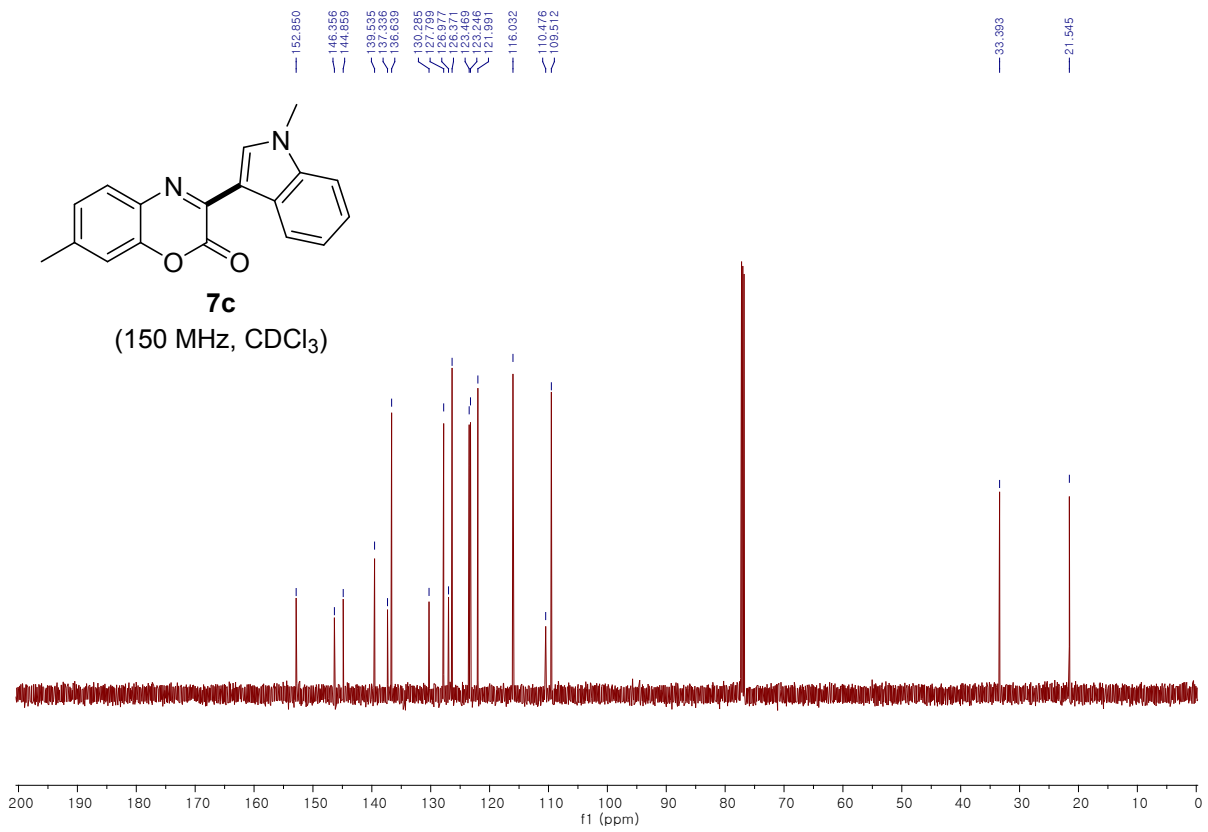

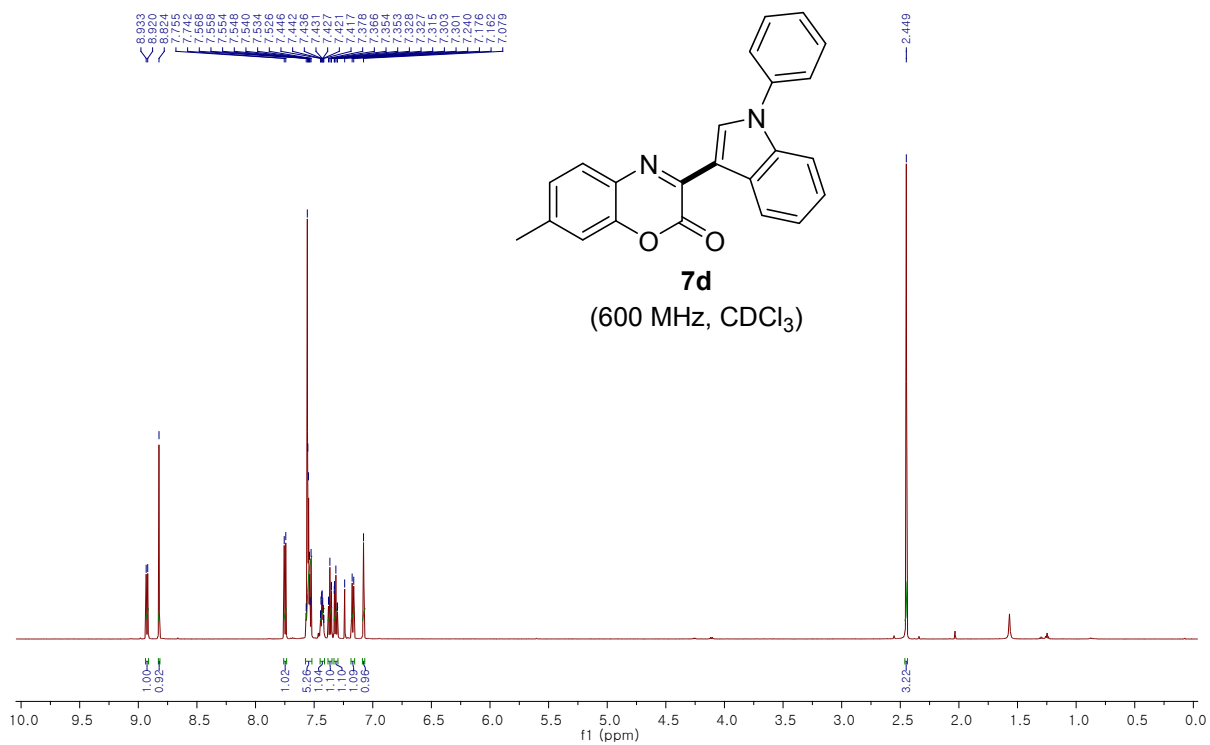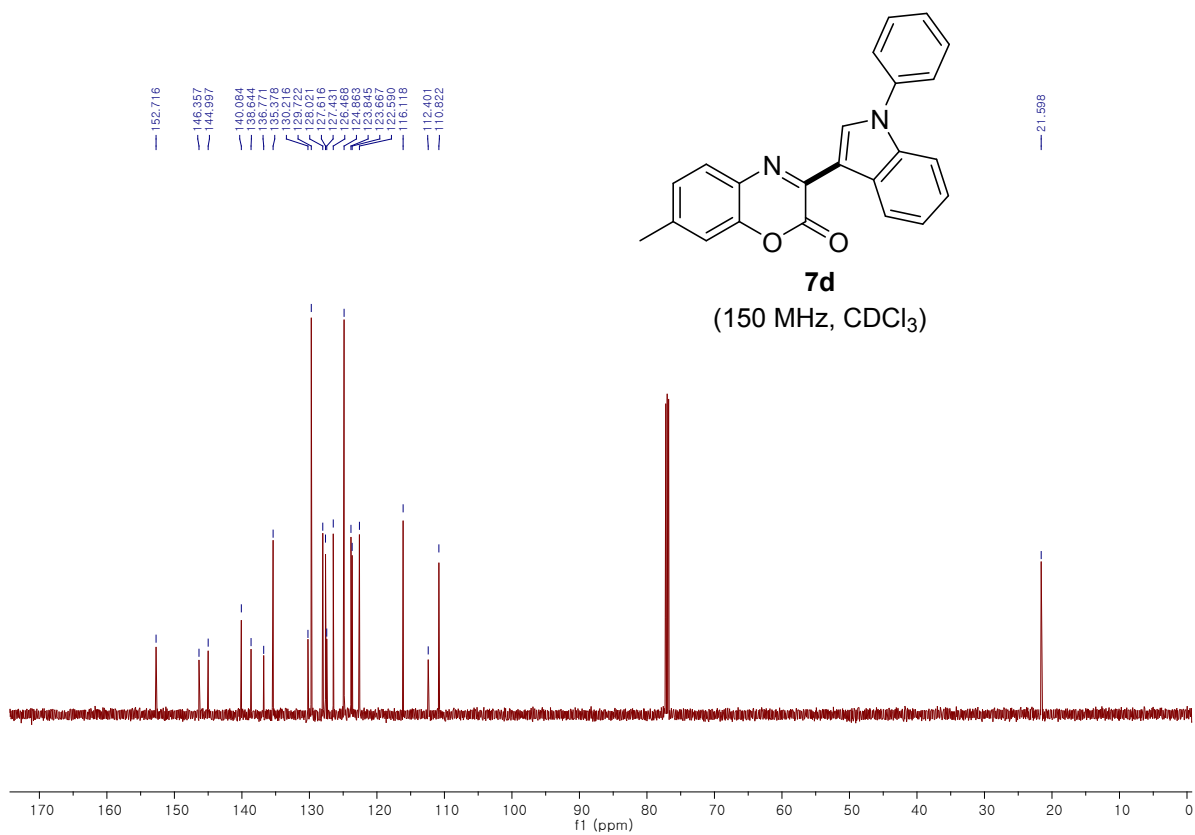



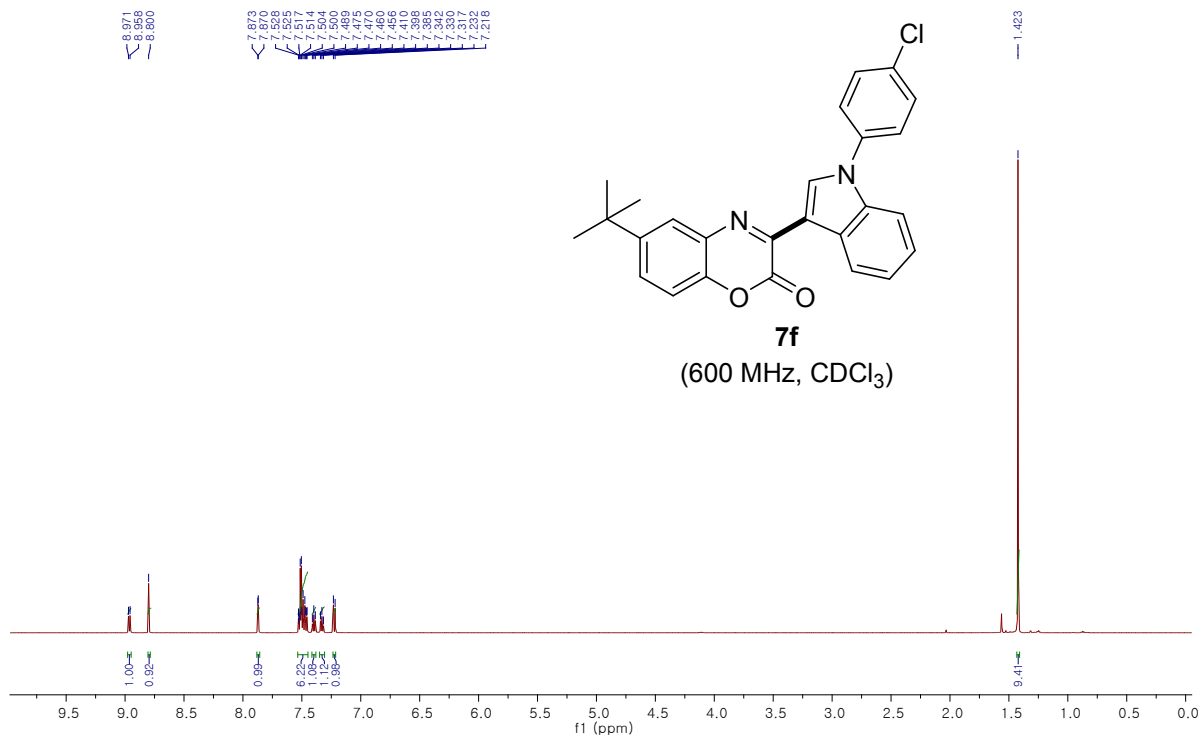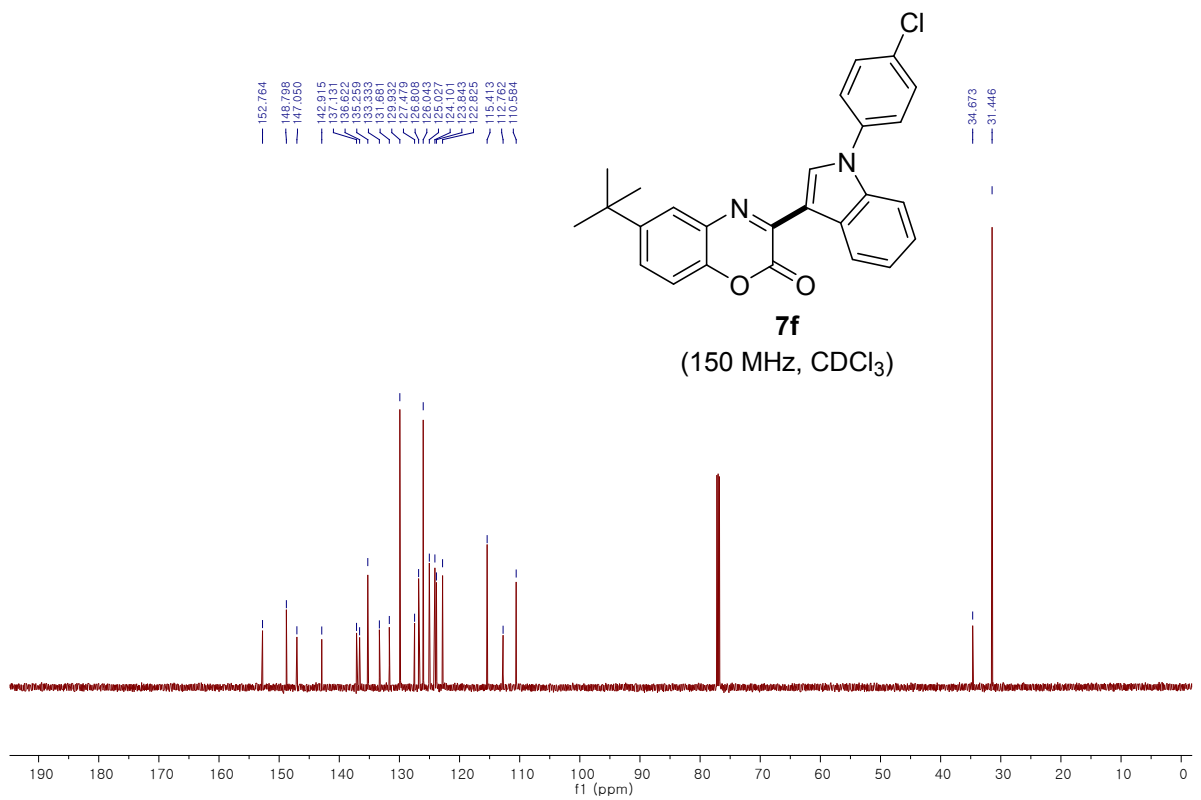

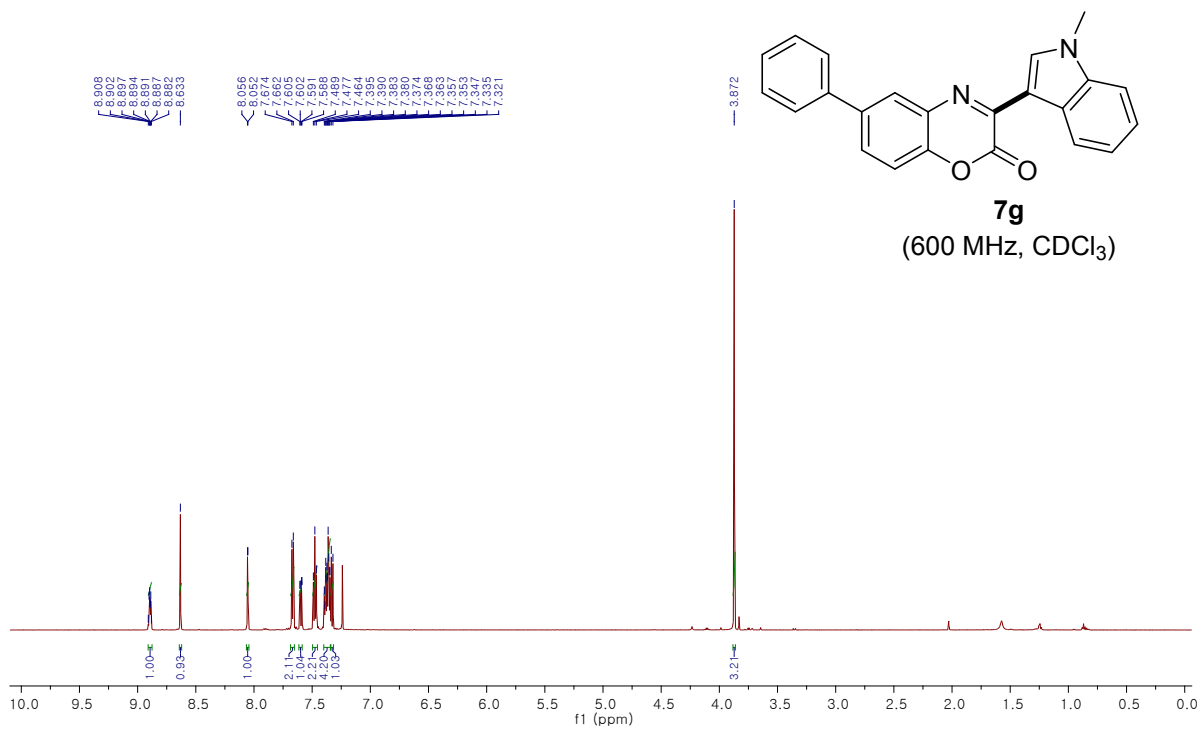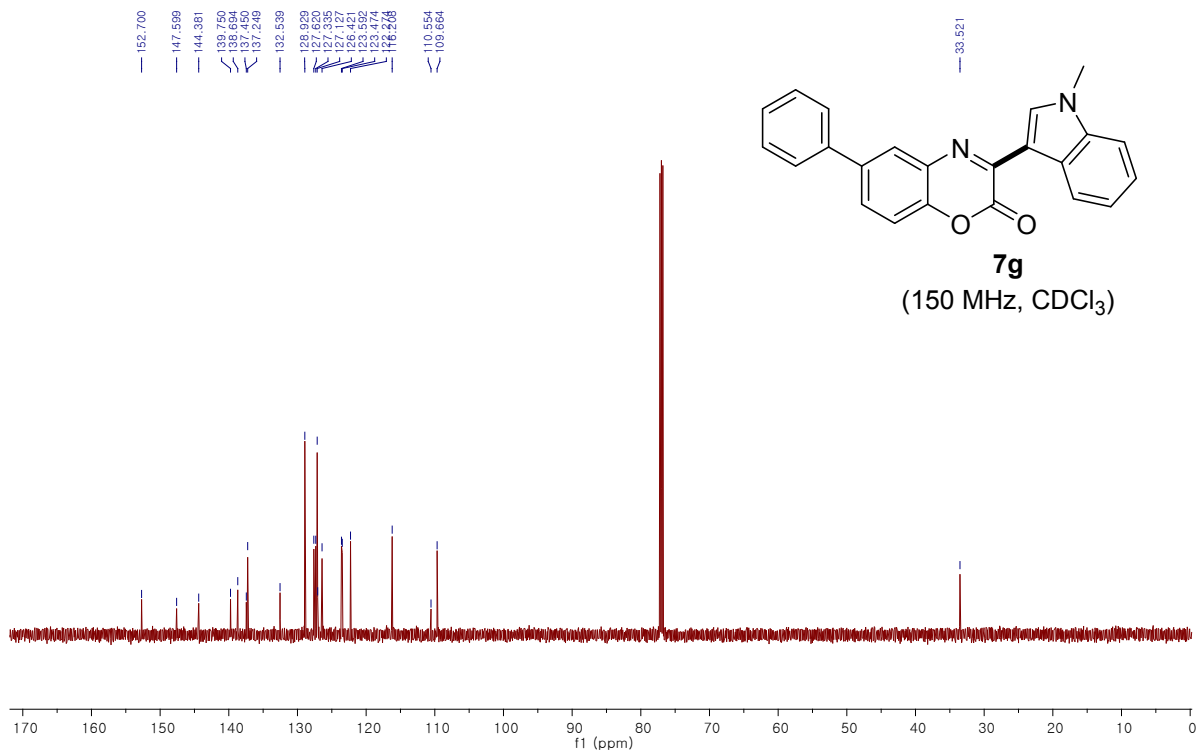

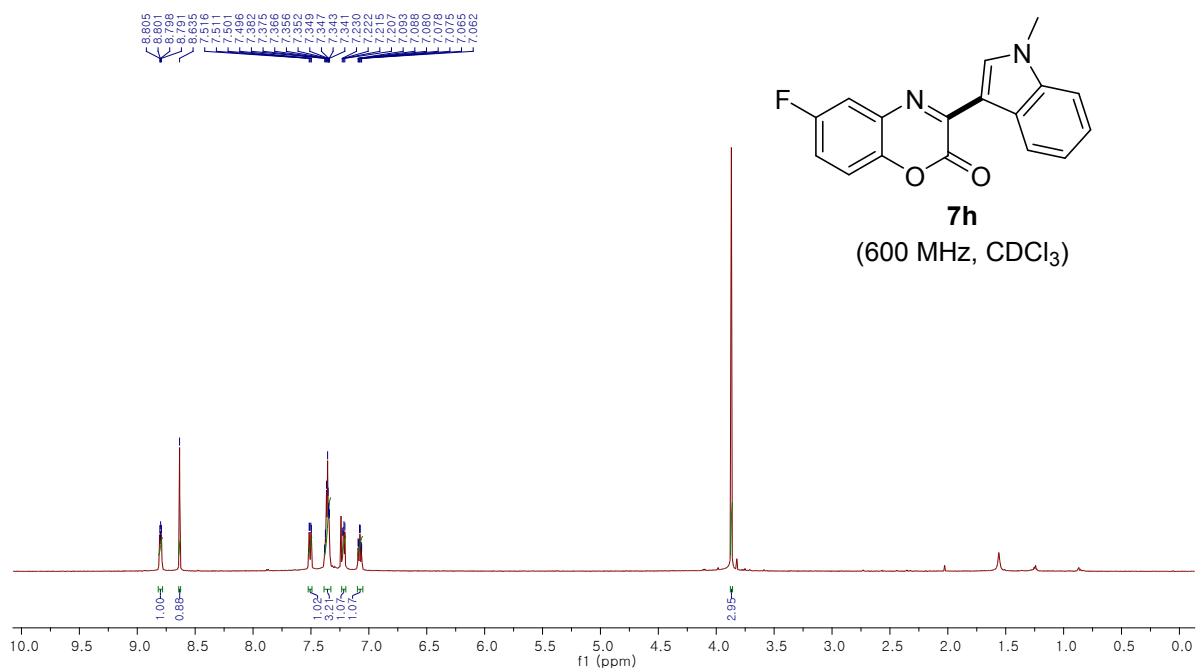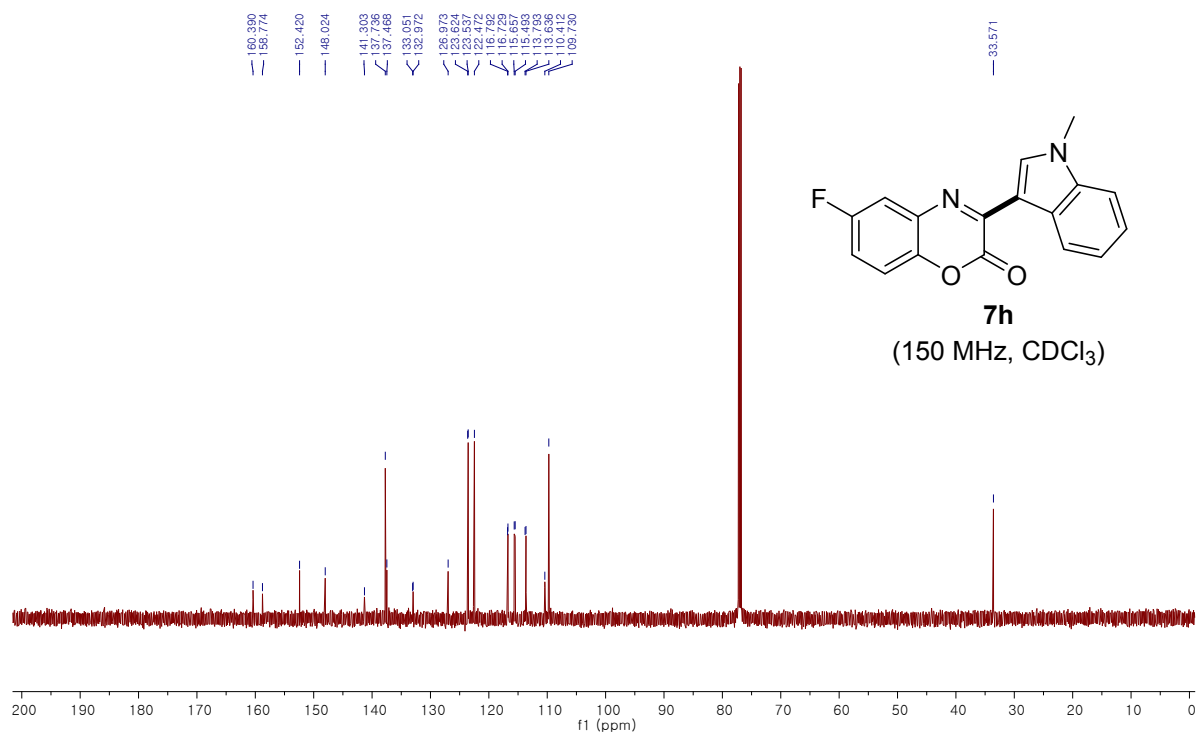

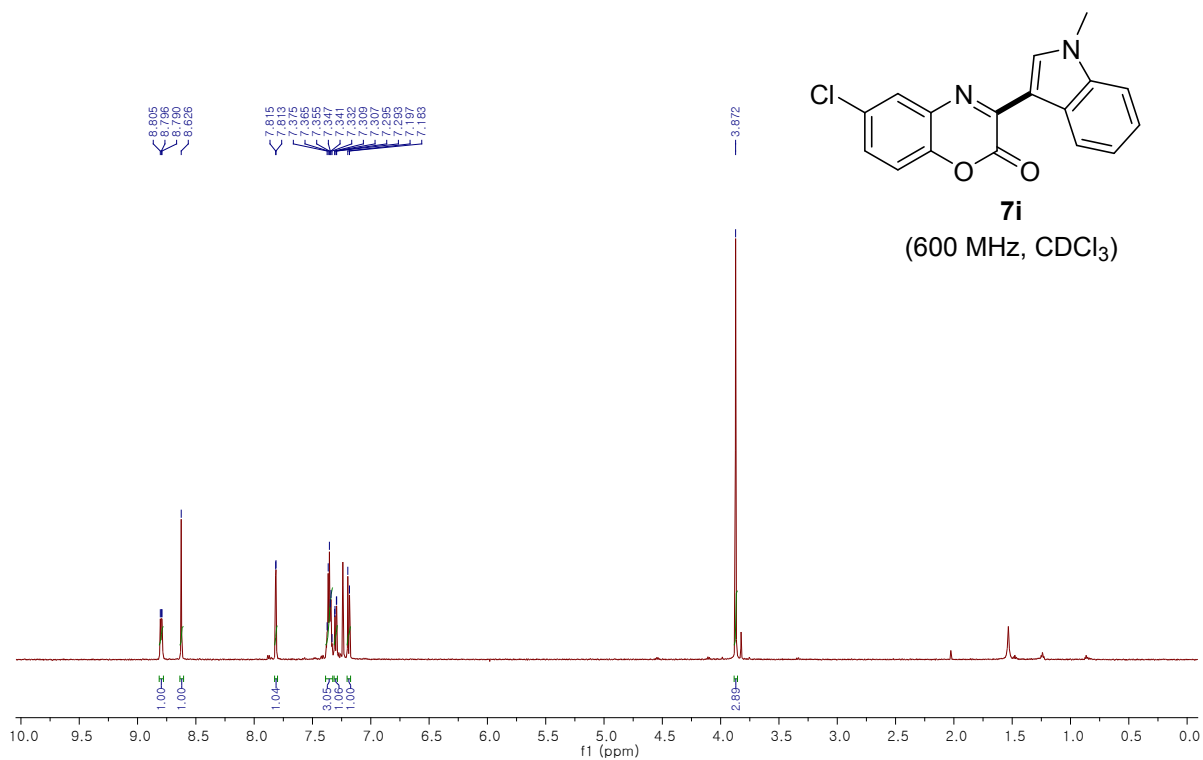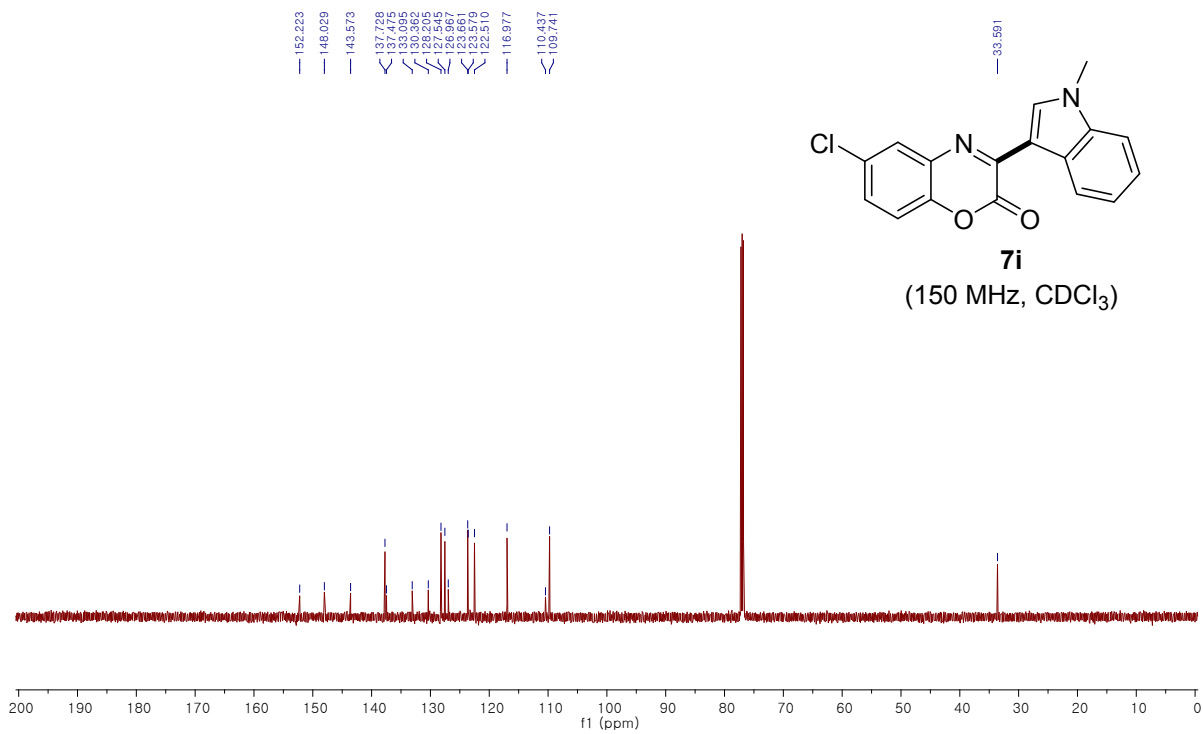

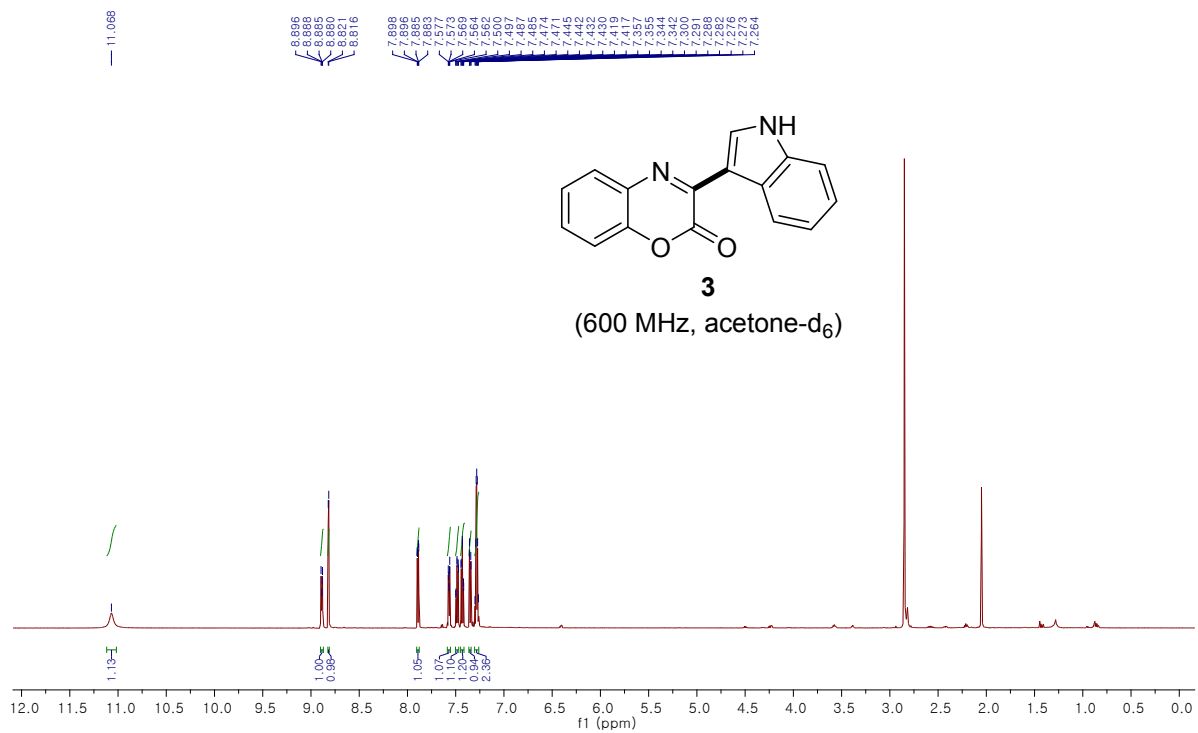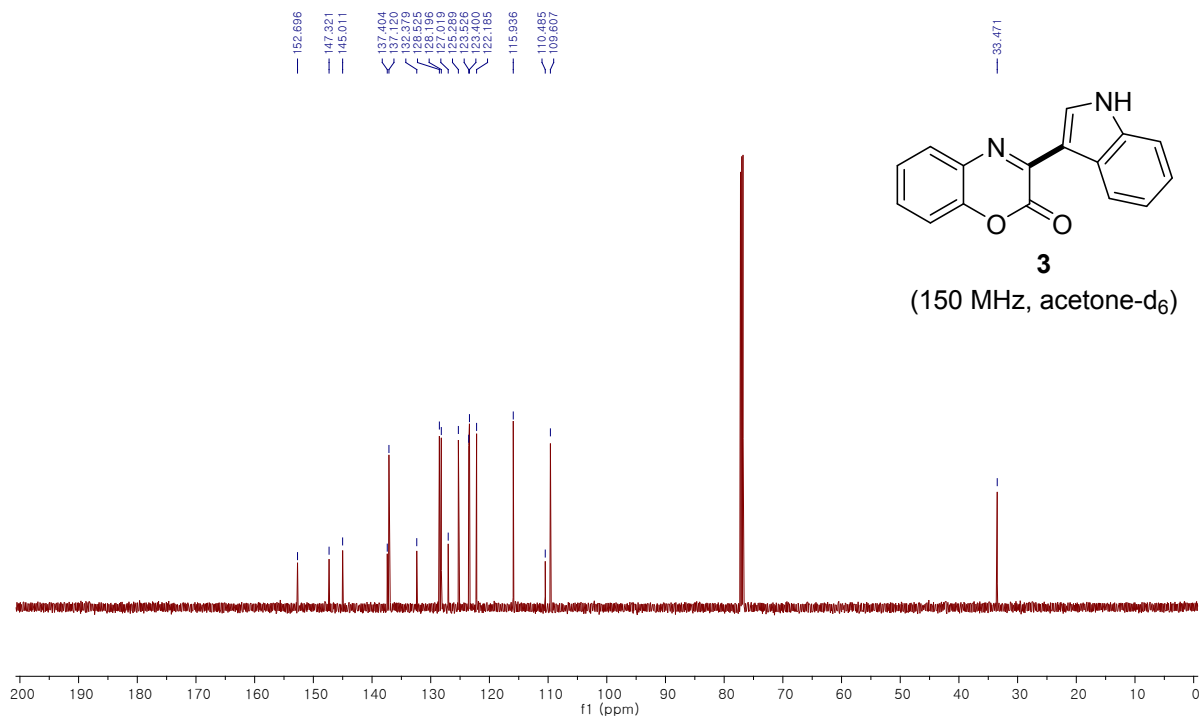



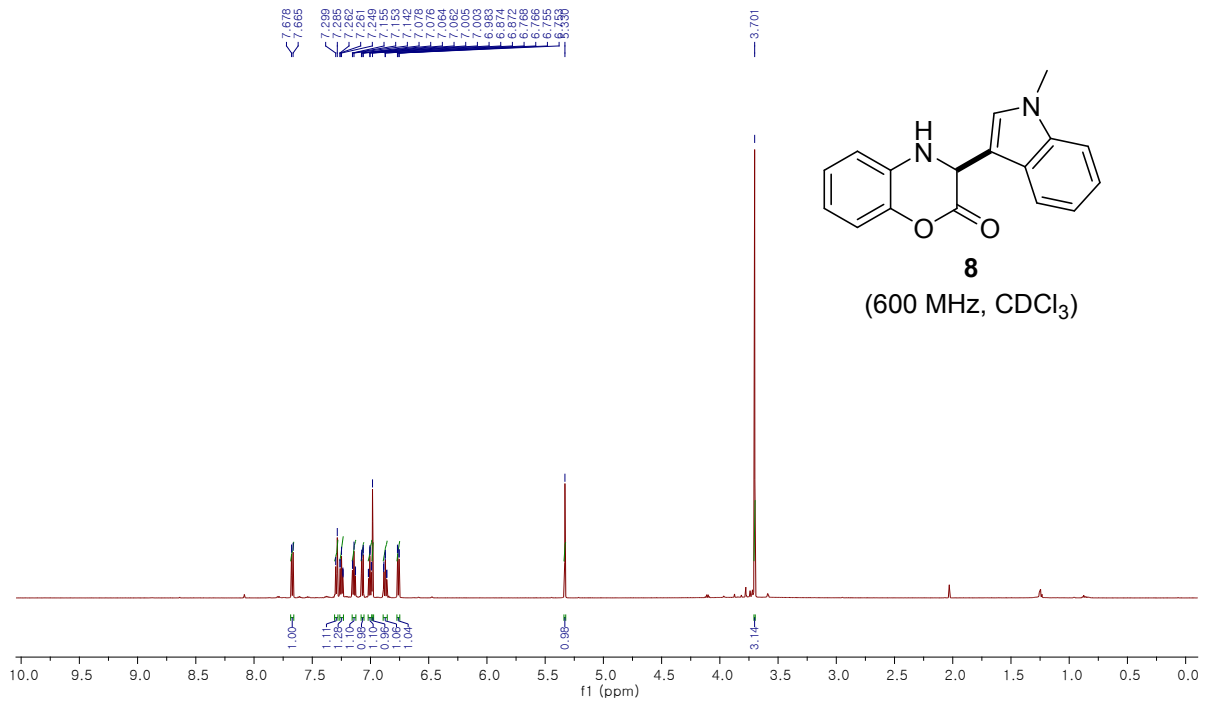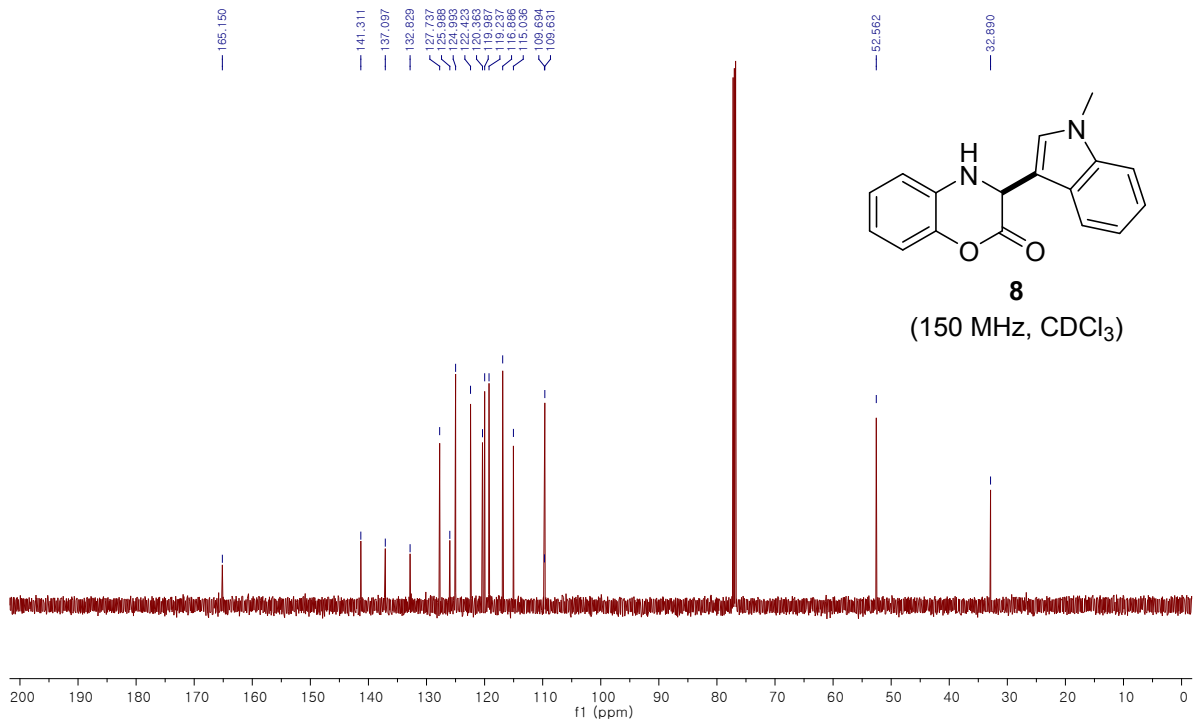

Supplement: c7ra10634c1.pdf [file c7ra10634c1.pdf]
